1        **Distinct mechanisms underlie the subsynaptic mobility of presynaptic**  
2        **metabotropic glutamate receptor types to tune receptor activation**

3

4

5                    Anna Bodzeta<sup>1</sup>, Florian Berger<sup>1</sup>, and Harold D. MacGillavry<sup>1,\*</sup>

6

7        <sup>1</sup> Division of Cell Biology, Neurobiology and Biophysics, Department of Biology,

8        Faculty of Science, Utrecht University, 3584 CH, The Netherlands.

9        \*Correspondence: [h.d.macgillavry@uu.nl](mailto:h.d.macgillavry@uu.nl) (HDM)

10

11 **ABSTRACT**

12 Presynaptic metabotropic glutamate receptors (mGluRs) are essential for activity-dependent  
13 modulation of synaptic transmission in the brain. However, the mechanisms that control the  
14 subsynaptic distribution and mobility of these receptors to contribute to their function are  
15 poorly understood. Here, using super-resolution microscopy and single-molecule tracking, we  
16 provide novel insights in the molecular mechanisms that control the spatial distribution and  
17 mobility of presynaptic mGluRs. We demonstrate that mGluR2 localizes diffusely along the  
18 axon and boutons and is highly mobile, while mGluR7 is immobilized specifically at the  
19 active zone, indicating that distinct mechanisms underlie the dynamic distribution of these  
20 receptor types. Indeed, we found that the positioning of mGluR2 is modulated by intracellular  
21 interactions. In contrast, immobilization of mGluR7 at the active zone is mediated by its  
22 extracellular domain that interacts in *trans* with the postsynaptic adhesion molecule ELFN2.  
23 Moreover, we found that receptor activation or changing synaptic activity does not alter the  
24 surface mobility of presynaptic mGluRs. Additionally, computational modeling of presynaptic  
25 mGluRs activity revealed that the precise subsynaptic localization of mGluRs determines their  
26 activation probability and thus directly impacts their ability to modulate neurotransmitter  
27 release. Altogether, this study demonstrates that distinct mechanisms control surface mobility  
28 of presynaptic mGluRs to differentially contribute to the regulation of glutamatergic synaptic  
29 transmission.

30

## 31 INTRODUCTION

32 Activity-directed modulation of synaptic efficacy underlies the ability of neuronal networks to  
33 process and store information. Presynaptic mechanisms that impinge on the neurotransmitter  
34 release machinery are a critical factor in fine tuning synaptic efficacy. In particular,  
35 presynaptic metabotropic glutamate receptors (mGluRs) are essential negative-feedback  
36 control elements that modulate transmission by dampening glutamate release (Pinheiro and  
37 Mulle, 2008; Reiner and Levitz, 2018). Disruptions in these receptor systems severely  
38 deregulate synaptic function and specific forms of synaptic plasticity, and aberrant mGluR  
39 function has been associated with several neurological disorders such as anxiety, epilepsy and  
40 schizophrenia, further highlighting their physiological importance (Muly et al., 2007; Sansig  
41 et al., 2001; Woolley et al., 2008). Nevertheless, it remains poorly understood how these  
42 receptors are organized at presynaptic sites to efficiently modulate transmission.

43 The eight known mGluRs (mGluR1 – mGluR8) belong to the class C G-protein-  
44 coupled receptors (GPCRs). These GPCRs exist as constitutive dimers and have a distinctive  
45 large extracellular domains (ECD) that contains the ligand-binding domain connected to the  
46 prototypical 7-helix transmembrane domain (TMD) via a cysteine-rich domain. mGluRs are  
47 further divided into three groups based on their sequence homology, downstream signaling  
48 partners and agonist selectivity (Niswender and Conn, 2010). These functionally diverse  
49 groups are expressed throughout the central nervous system but are generally targeted to  
50 specific subcellular locations. Group I mGluRs (mGluR1/5) are primarily expressed at  
51 postsynaptic sites, group II mGluRs (mGluR2/3) are present at both pre- and postsynaptic  
52 sites, and group III mGluRs (mGluR4, mGluR6-8) are located almost exclusively at  
53 presynaptic sites (Petralia et al., 1996; Shigemoto et al., 1996). The presynaptic group II and  
54 III mGluRs mGluR2 and mGluR7 are both abundantly expressed in the hippocampus  
55 (Kinoshita et al., 1998), share substantial homology (~60%), and both couple to inhibitory G-

56 proteins ( $G\alpha_{i/o}$ ) that repress adenylyl cyclase activity. Nevertheless, these receptors differ  
57 significantly in their pharmacological characteristics and interactome, conferring functionally  
58 distinct roles to these receptors in synaptic transmission and plasticity.

59 Generally, activation of presynaptic mGluRs depresses synaptic transmission via  
60 inhibition of voltage-gated  $Ca^{2+}$ -channels (VGCC), activation of  $K^+$  channels, or by directly  
61 modulating components of the release machinery such as Munc13, Munc18 and RIM-1 (de  
62 Jong and Verhage, 2009; Pinheiro and Mulle, 2008). As such, these receptors have been  
63 implicated in the regulation of both short-term plasticity as well as long-term depression of  
64 synaptic responses (Kamiya and Ozawa, 1999; Martín et al., 2007; Millán et al., 2002;  
65 Okamoto et al., 1994; Pelkey et al., 2008, 2005; Robbe et al., 2002). However, signaling  
66 events downstream of presynaptic mGluRs can also potentiate release, and particularly  
67 mGluR7 has been postulated to bidirectionally regulate synaptic transmission (Dasgupta et al.,  
68 2020; Klar et al., 2015; Martín et al., 2018, 2010). Thus, presynaptic mGluRs modulate  
69 synaptic transmission through a variety of downstream effectors, and the functional outcome  
70 of mGluR activation is probably determined by the frequency and duration of synaptic  
71 signals. Additionally, the subsynaptic distribution and dynamics of presynaptic mGluRs are  
72 likely to influence their ability to become activated and engage local downstream signaling  
73 partners. In particular, since these receptors have different affinities for glutamate, their  
74 subsynaptic position relative to the point of glutamate release ultimately determines their  
75 probability of activation. mGluR2 has a moderate to high affinity for glutamate (in the  
76 micromolar range) and its positioning relative to the release site might thus only modestly  
77 affect its contribution to regulating release probability. In contrast, when measured in non-  
78 neuronal cells, the affinity of mGluR7 for glutamate is exceptionally low, in the millimolar  
79 range (0.5-2.5 mM) (Schoepp et al., 1999). In addition, mGluRs are obligatory dimers and  
80 activation of single subunits in an mGluR dimer produces only low-efficacy activation. Given

81 that release events produce only brief, 1-3 mM peaks in glutamate concentration in the  
82 synaptic cleft (Diamond and Jahr, 1997; Lisman et al., 2007), it has thus been questioned  
83 whether mGluR7 at neuronal synapses, even when placed immediately adjacent to release  
84 sites, will ever be exposed to sufficient levels of glutamate to become activated. However, this  
85 is in contrast with the wealth of physiological evidence from different model systems that  
86 show that mGluR7 is a key modulator of synaptic transmission (Bushell et al., 2002; Klar et  
87 al., 2015; Martín et al., 2018; Millán et al., 2002; Pelkey et al., 2008, 2005; Sansig et al.,  
88 2001). Interestingly, recent evidence indicated that the postsynaptic adhesion proteins ELFN1  
89 and 2 (extracellular leucine-rich repeat and fibronectin type III domain-containing 1 and 2)  
90 transsynaptically interact with mGluR7 to confer allosteric modulation of the receptor,  
91 potentially altering the threshold for mGluR7 activation within the context of individual  
92 synapses (Dunn et al., 2019b; Stachniak et al., 2019; Sylwestrak and Ghosh, 2012; Tomioka  
93 et al., 2014). Thus, the precise localization of presynaptic mGluRs determines their activation  
94 probability and greatly impacts their ability to modulate synaptic transmission through local  
95 downstream effectors. Nevertheless, quantitative insight in the dynamic distribution of  
96 presynaptic mGluRs in live neurons and the mechanisms that control their dynamic  
97 positioning is lacking.

98 Here, to understand how mGluR2 and mGluR7 contribute to synaptic transmission, we  
99 studied how the dynamic positioning of subsynaptic distribution of these receptors is  
100 mechanistically controlled. Using complementary super-resolution imaging approaches, we  
101 found that mGluR2 is highly dynamic and localized throughout the axon, while mGluR7 is  
102 immobilized at presynaptic active zones. Surprisingly, we found that the specific positioning  
103 of mGluR7 is not controlled by intracellular interactions but relies on extracellular  
104 interactions. Specifically, we identified that the ECD of mGluR7, that interacts with the  
105 postsynaptic protein ELFN2, is required for anchoring mGluR7 at the active zone.

106 Furthermore, a computational model of mGluR activation at presynaptic sites indicates that  
107 mGluR2 activation is only loosely coupled to release site location, while activation of  
108 mGluR7 is inefficient, even when localized within a few nanometers of the release site or  
109 during high-frequency stimulation patterns. Based on our findings, we propose that the  
110 different mechanisms that control presynaptic mGluR positioning ensure the differential  
111 contribution of these receptors to transmission.

112

## 113 **RESULTS**

114

### 115 **Distinct differences in the subsynaptic distribution of presynaptic mGluR subtypes**

116 The precise spatial distribution of mGluR subtypes at presynaptic sites likely determines their  
117 functional contribution to the modulation of synaptic transmission. To compare the  
118 subsynaptic distribution of presynaptic group II and III mGluRs in hippocampal neurons, we  
119 determined the localization of mGluR2 (group II) and mGluR7 (group III) relative to the  
120 active zone marker Bassoon (Bsn) using two-color gated stimulated emission depletion  
121 (gSTED) super-resolution microscopy. To visualize mGluR2, we tagged endogenous mGluR2  
122 with super-ecliptic pHluorin (SEP), a pH-sensitive variant of GFP, using a recently developed  
123 CRISPR/Cas9-mediated knock-in approach (Willems et al., 2020). Because the level of  
124 endogenous mGluR2 expression was low, we enhanced the SEP signal using anti-GFP  
125 staining to reliably measure mGluR2 distribution. We found that mGluR2 was localized both  
126 in axons and dendrites (Figure 1 - figure supplement 1A), as reported previously (Ohishi et  
127 al., 1994), but even though an earlier study suggested that mGluR2 is located in the  
128 preterminal region of the axon, and not in presynaptic boutons (Shigemoto et al., 1997), we  
129 detected mGluR2 both in the axon shaft and within synaptic boutons (Figure 1A). However,  
130 as is apparent from line profiles of the fluorescence intensity of mGluR2 signal along Bsn-  
131 labeled puncta, the mGluR2 signal was largely excluded from presynaptic active zones  
132 (Figure 1B). Confirming this finding, a similar distribution pattern was observed using  
133 antibody labeling for mGluR2/3 (Figure 1 - figure supplement 1B, C), further indicating that  
134 presynaptic group II mGluRs are distributed throughout the axon but excluded from active  
135 zones. Immunostaining for the group III mGluR, mGluR7 labeled a subset of neurons in our  
136 cultures (Figure 1C and Figure 1 - figure supplement 1D), consistent with previous studies  
137 (Shigemoto et al., 1996; Tomioka et al., 2014). In contrast to mGluR2, line profiles indicated

138 that the maximum intensity of mGluR7 labeling coincided with the Bsn-marked active zone  
139 (Figure 1D). Co-localization analysis further confirmed this, showing that the majority of  
140 mGluR7-positive puncta overlap with Bsn-positive puncta, while mGluR2 labeling showed a  
141 striking lack of overlap with Bsn (co-localization with Bsn-positive puncta, mGluR2:  $0.12 \pm$   
142  $0.02$ , mGluR7:  $0.54 \pm 0.03$ ; Figure 1E). Together, these results indicate that two presynaptic  
143 mGluR subtypes that are both implicated in the regulation of presynaptic release properties,  
144 have distinct subsynaptic distribution patterns.

145



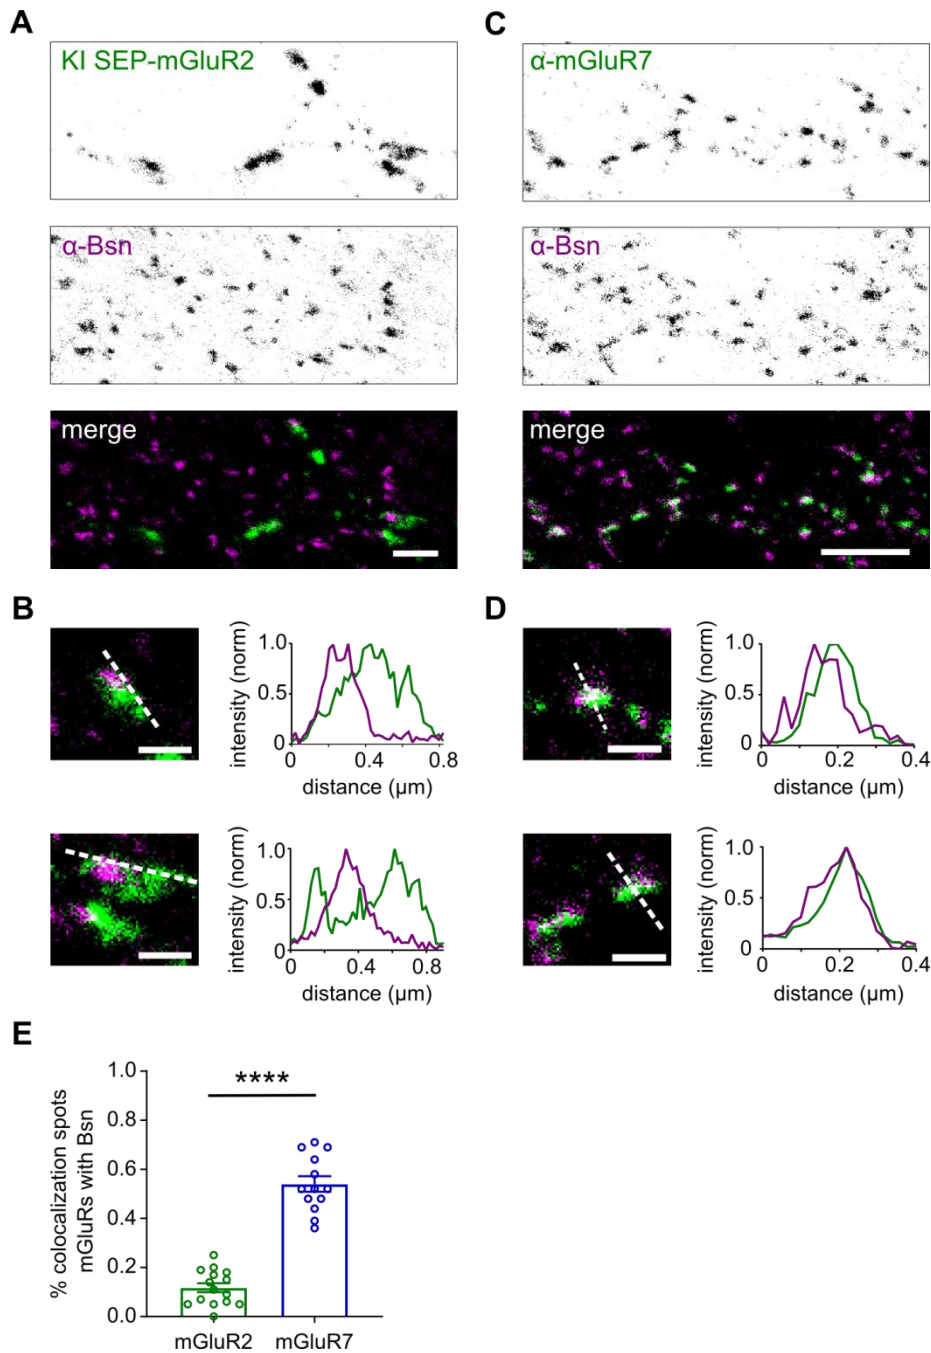

146

147

148 **Figure 1:** Subsynaptic distribution of presynaptic mGluRs. (A) gSTED image of SEP-  
149 mGluR2 CRISPR/Cas9 knock-in neuron co-stained with anti-Bassoon (STAR635P) (Bsn).  
150 Note that due to the low endogenous expression level of mGluR2, SEP signal was enhanced  
151 with anti-GFP (STAR580) staining. Scale bar, 2  $\mu$ m. (B) Example images and intensity  
152 profiles of individual mGluR2 positive synapses from (A). Scale bar, 500 nm. (C) gSTED  
153 image of neuron co-stained with anti-mGluR7 (STAR580) and anti-Bsn (STAR635P). Scale  
154 bar, 2  $\mu$ m. (D) Example images and intensity profiles of individual mGluR7-positive synapses  
155 from (C). Scale bar: 500 nm. (E) Quantification of co-localization between presynaptic  
156 mGluRs and Bsn. Unpaired *t*-test, \*\*\*  $P < 0.001$ .

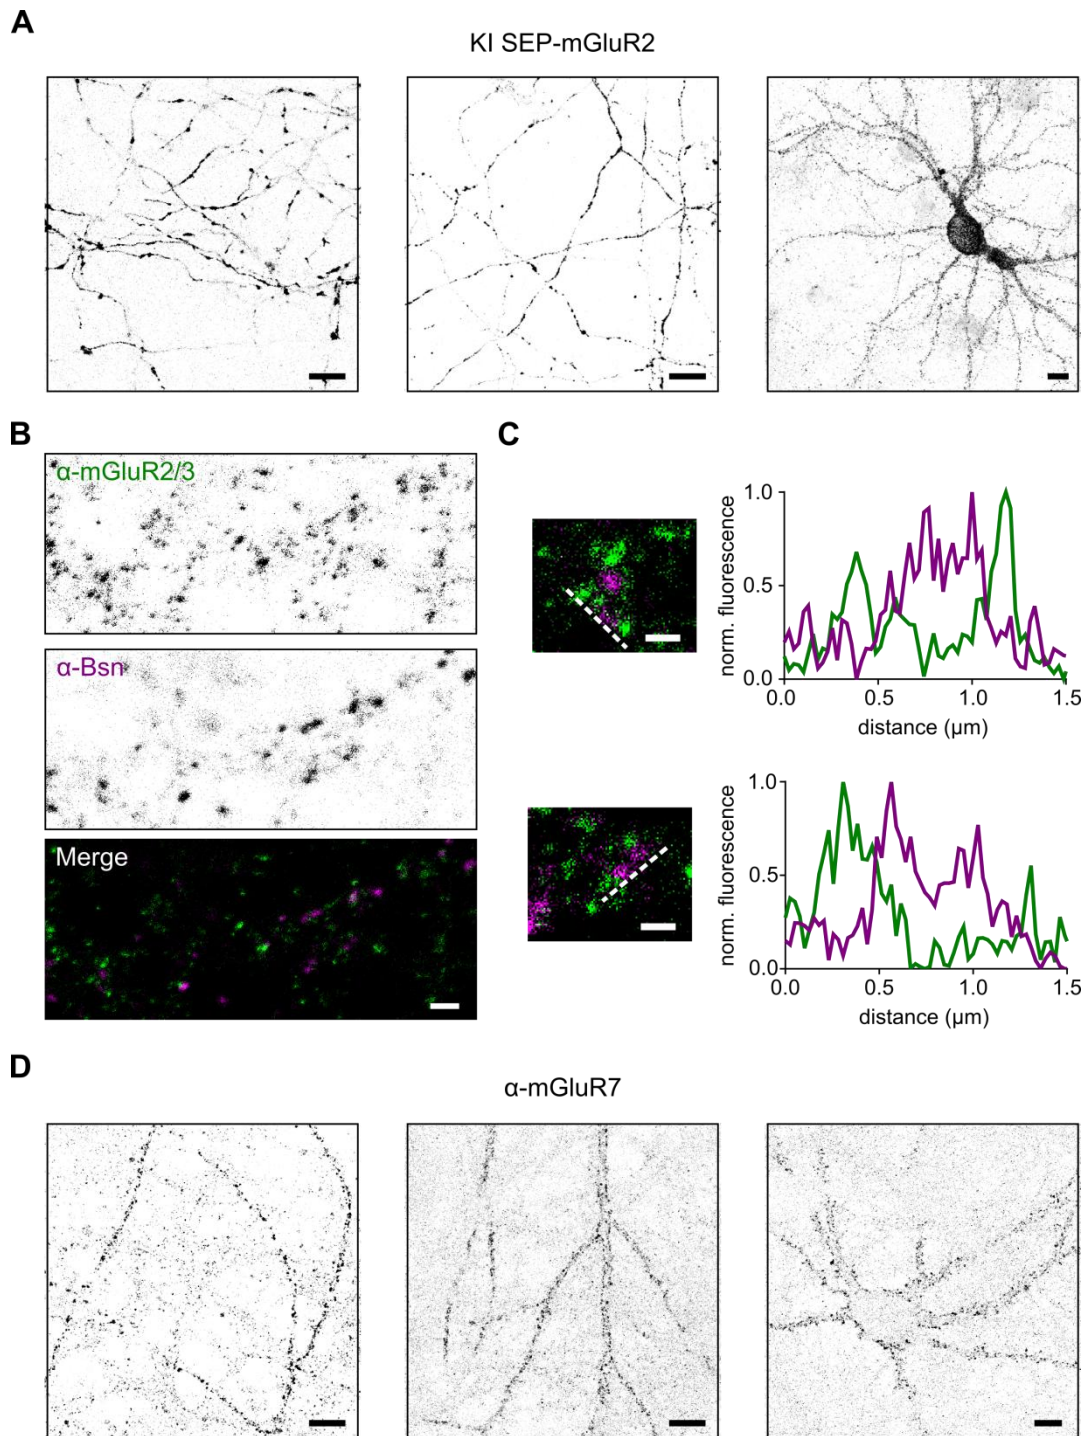

157

158

159 **Figure supplement 1.** Distribution of presynaptic mGluRs. (A) Example confocal images of

160 SEP-mGluR2 knock-in neurons. SEP signal was enhanced with anti-GFP (STAR580)

161 staining. Scale bar 10  $\mu$ m. (B) gSTED image of neuron co-stained with anti-mGluR2/3

162 (STAR580) and anti-Bassoon (STAR635P) (Bsn). Scale bar, 2  $\mu$ m. (C) Example images and

163 intensity profiles of individual mGluR2/3 positive synapses from (B). Scale bar, 500 nm.

164 (D) Example confocal images of neurons stained with anti-mGluR7 (STAR580). Scale bar,

165 10  $\mu$ m.

166

167

168 **Differential stability of mGluR2 and mGluR7 at presynaptic boutons**

169 To test if the observed receptor distributions reflect differences in surface mobility in the  
170 axonal membrane, we expressed SEP-tagged mGluR2 and mGluR7 to visualize surface-  
171 expressed receptors in live cells and performed fluorescence recovery after photobleaching  
172 (FRAP) experiments. Importantly, we found that expressed receptors were efficiently targeted  
173 to axons and their localization was consistent with the observed endogenous distributions.  
174 SEP-mGluR7 was enriched in presynaptic boutons, while SEP-mGluR2 expression was more  
175 diffuse throughout the axon (Figure 2- figure supplement 2). We photobleached the  
176 fluorescence in small regions overlapping with presynaptic boutons and monitored the  
177 recovery of fluorescence over time. Strikingly, the recovery of fluorescence was much more  
178 rapid and pronounced for SEP-mGluR2 than for SEP-mGluR7 (Figure 2A, B). Indeed,  
179 quantification of the fluorescence recovery curves showed that the mobile fraction (SEP-  
180 mGluR2:  $0.60 \pm 0.04$ , SEP-mGluR7:  $0.29 \pm 0.03$ ,  $P < 0.0005$ , unpaired *t*-test; Figure 2D) and  
181 the recovery half-time (SEP-mGluR2  $15.0 \pm 1.8$  s, SEP-mGluR7  $23.5 \pm 2.3$  s,  $P < 0.05$ ,  
182 unpaired *t*-test; Figure 2C) of SEP-mGluR2 were significantly higher than observed for SEP-  
183 mGluR7. Thus, these results indicate that mGluR2 is highly mobile in axons, while mGluR7  
184 is immobilized at presynaptic sites and displays minor exchange between synapses.

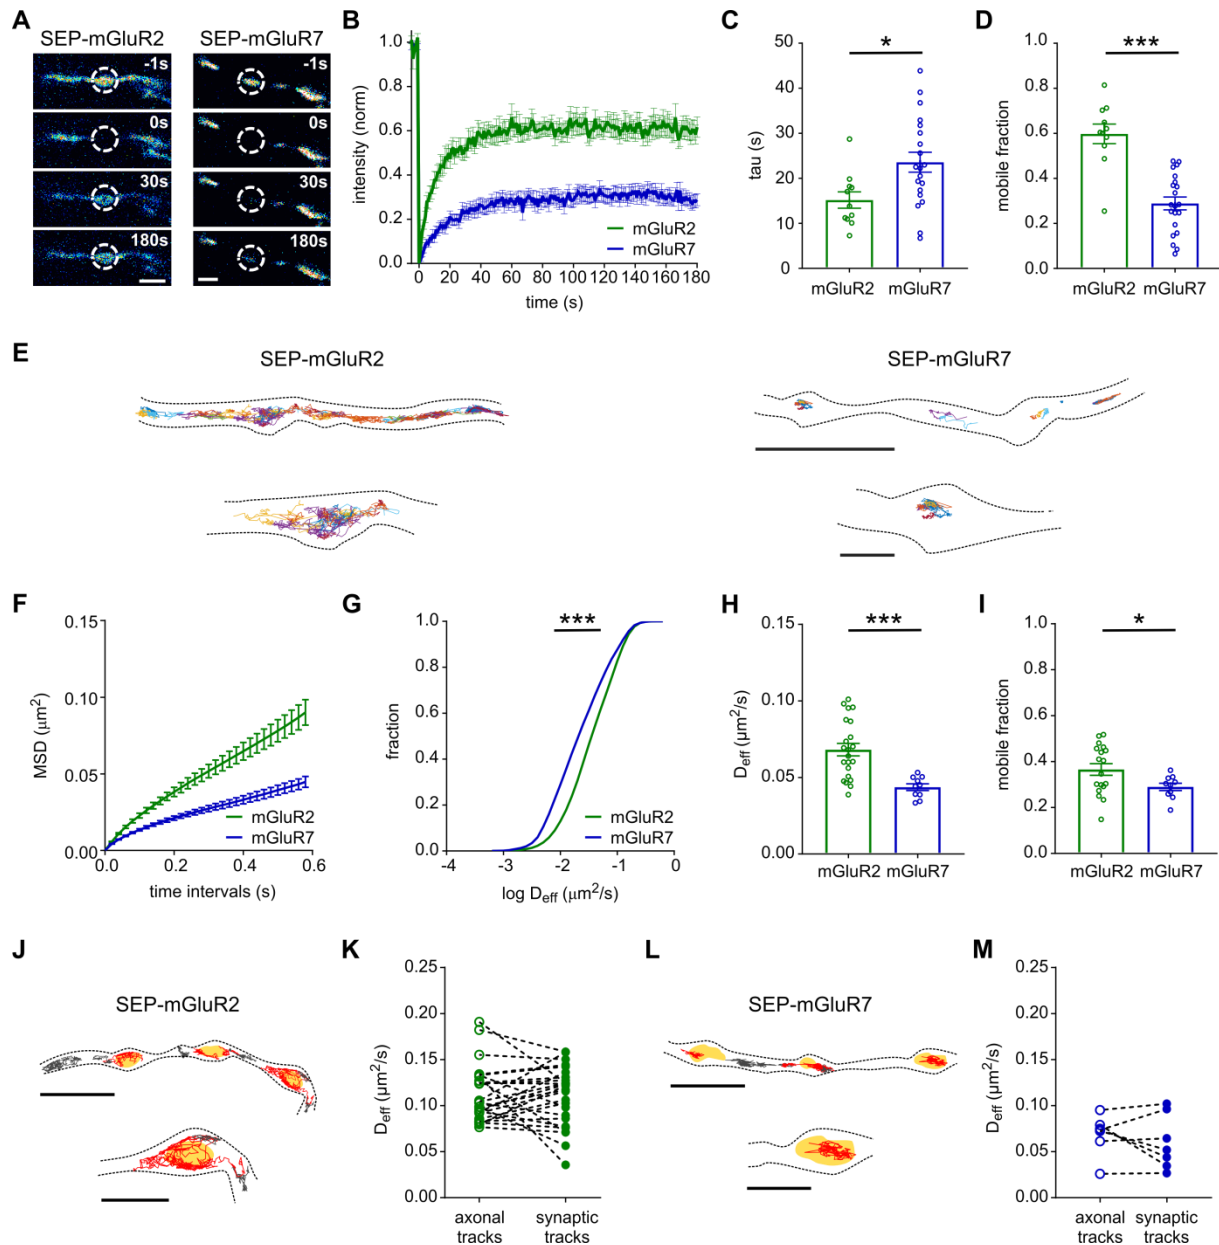

185

186 **Figure 2:** Distinct surface diffusion behavior of mGluR2 and mGluR7. (A) Example images  
 187 from a FRAP time series in neurons expressing SEP-mGluR2 and SEP-mGluR7. The dotted  
 188 circles indicate the bleached boutons. Scale bar, 1  $\mu\text{m}$ . (B) Normalized fluorescence recovery  
 189 of SEP-mGluR2 and SEP-mGluR7 ( $n = 11$  boutons for SEP-mGluR2, 21 boutons for SEP-  
 190 mGluR7 from 2 independent experiments). (C) and (D) Quantification of half time of  
 191 fluorescence recovery (C) and mobile fraction (D) of SEP-tagged mGluRs. Unpaired  $t$ -test,  
 192 \*  $P < 0.05$ , \*\*\*  $P < 0.0005$ . Error bars represent SEM. (E) Example trajectories of SEP-  
 193 mGluR2 and SEP-mGluR7. Trajectories are displayed with random colors. Outlines of cells  
 194 are based on TIRF image of SEP signal. Scale bar, 5  $\mu\text{m}$ ; zooms, 1  $\mu\text{m}$ . (F) Average mean  
 195 square displacement (MSD) plot of SEP-mGluR2 and SEP-mGluR7 ( $n = 22$  fields of view for  
 196 mGluR2, 10 fields of view for mGluR7 from 3 independent experiments). (G) Frequency  
 197 distribution of instantaneous diffusion coefficient ( $D_{\text{eff}}$ ) of SEP-mGluR2 and SEP-mGluR7  
 198 ( $n = 22,821$  trajectories for SEP-mGluR2, 5,161 trajectories for SEP-mGluR7).  
 199 Kolmogorov-Smirnov test; \*\*\*  $P < 0.0001$ . (H) and (I) Quantification of the average  
 200 instantaneous diffusion coefficient ( $D_{\text{eff}}$ ) (H) and mobile fraction (I) of SEP-tagged mGluRs  
 201 ( $n = 22$  fields of view for mGluR2, 10 fields of view for mGluR7 from 3 independent

202 experiments). Unpaired  $t$ -test; \*  $P < 0.05$ , \*\*\*  $P < 0.0005$ . Error bars represent SEM.  
203 (J) Trajectories of SEP-mGluR2 plotted on top of the mask marking the presynaptic bouton.  
204 Red tracks - synaptic tracks, grey tracks - axonal tracks, yellow areas - bouton mask based on  
205 Syp-mCherry signal. Scale bar, 2  $\mu\text{m}$ ; zooms, 1  $\mu\text{m}$ . (K) Quantification of the instantaneous  
206 diffusion coefficient ( $D_{\text{eff}}$ ) of axonal and synaptic tracks of SEP-mGluR2 ( $n = 27$  fields of  
207 view from 2 independent experiments). (L) Trajectories of SEP-mGluR7 plotted on top of the  
208 mask marking the presynaptic bouton, as in (J). (M) Quantification of instantaneous diffusion  
209 coefficient ( $D_{\text{eff}}$ ) of axonal and synaptic tracks of SEP-mGluR7 ( $n = 7$  fields of view from 2  
210 independent experiments).  
211  
212

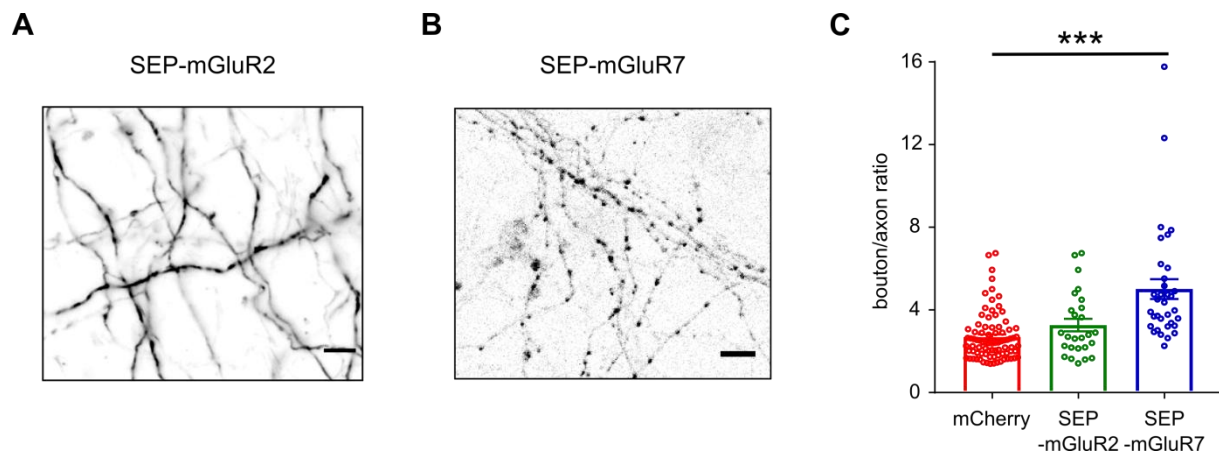

213

214

215 **Figure supplement 2.** Targeting of SEP-tagged mGluRs. (A) Example confocal image of  
216 neurons expressing SEP-mGluR2. Scale bar, 5  $\mu\text{m}$ . (B) Example confocal image of neurons  
217 expressing SEP-mGluR7. Scale bar, 5  $\mu\text{m}$ . (C) Quantification of ratios of fluorescence  
218 intensity in bouton over axon ( $n = 84$  boutons for mCherry, 26 boutons for SEP-mGluR2,  
219 34 boutons for SEP-mGluR7 from 2 independent experiments). The apparent increase in  
220 bouton/axon ratio of cytosolic mCherry likely results from larger bouton volume compared to  
221 axon. One-way ANOVA followed by Dunnett's multiple comparisons test, \*\*\*  $P < 0.001$ .  
222

223

## 224 **Single-molecule tracking reveals differences in diffusional behavior of mGluR2 and** 225 **mGluR7**

226 To resolve the dynamics of mGluR2 and mGluR7 at high spatial resolution and to investigate  
227 whether the diffusional behavior of these receptors is heterogeneous within axons, we next  
228 performed live-cell single-molecule tracking experiments using universal point accumulation  
229 in nanoscale topography (uPAINT) (Giannone et al., 2010). SEP-tagged receptors were

230 labeled with anti-GFP nanobodies conjugated to ATTO-647N at low concentrations, which  
231 allowed to reliably detect, localize, and track single receptors over time for up to several  
232 seconds. The acquired receptor tracks were then compiled into trajectory maps revealing the  
233 spatial distribution of receptor motion. These maps were consistent with the receptor  
234 distribution patterns as resolved with gSTED imaging. SEP-mGluR2 seemed to rapidly  
235 diffuse throughout the axon and synaptic boutons, while SEP-mGluR7 motion was limited  
236 and highly confined within synaptic boutons with only a few molecules occasionally diffusing  
237 along the axon shaft (Figure 2E). The mean squared displacement (MSD) vs. elapsed time  
238 curves (Figure 2F) display a sublinear relationship for both receptor types indicating that the  
239 majority of these receptors undergo anomalous diffusion. The instantaneous diffusion  
240 coefficients ( $D_{\text{eff}}$ ) for both receptors was estimated by fitting the slope through the four initial  
241 points of the MSD curves. Histograms of  $D_{\text{eff}}$  estimated from individual trajectories (Figure  
242 2G) and the average  $D_{\text{eff}}$  per field of view (Figure 2H) revealed a significantly higher  
243 diffusion coefficient for SEP-mGluR2 than for SEP-mGluR7 ( $D_{\text{eff}}$  SEP-mGluR2:  $0.068 \pm$   
244  $0.004 \mu\text{m}^2/\text{s}$ , SEP-mGluR7:  $0.044 \pm 0.002 \mu\text{m}^2/\text{s}$ ,  $P < 0.0005$ , unpaired  $t$ -test), further  
245 indicating that mGluR2 diffuses much more rapidly in the axonal membrane than mGluR7. In  
246 addition, we classified the receptors diffusional states as either mobile or immobile in a  
247 manner independent of MSD-based diffusion coefficient estimation, i.e. by determining the  
248 ratio between the radius of gyration and the mean displacement per time step of individual  
249 trajectories (Golan and Sherman, 2017). Using this approach, we found that SEP-mGluR2  
250 showed a higher fraction of mobile tracks than SEP-mGluR7 (mobile fraction SEP-mGluR2:  
251  $0.37 \pm 0.03$ , SEP-mGluR7:  $0.29 \pm 0.02$ ,  $P < 0.05$ , unpaired  $t$ -test; Figure 2I) further confirming  
252 that in axons, mGluR2 is overall more mobile than mGluR7.

253 To determine whether the surface mobility of these receptors is differentially regulated  
254 at synaptic sites, we co-expressed SEP-tagged mGluRs together with a marker of presynaptic

255 boutons, Synaptophysin1 (Syp1) fused to mCherry. Based on epifluorescence images of  
256 Syp1-mCherry, we created a mask of presynaptic boutons and compared the  $D_{\text{eff}}$  of receptors  
257 diffusing inside or outside synapses (Figure 2J, L). The diffusion coefficient of SEP-mGluR2  
258 within presynaptic boutons and along axons did not differ significantly ( $D_{\text{eff}}$  axonal tracks:  
259  $0.113 \pm 0.006 \mu\text{m}^2/\text{s}$ ,  $D_{\text{eff}}$  synaptic tracks:  $0.110 \pm 0.006 \mu\text{m}^2/\text{s}$ ,  $P > 0.05$ , paired  $t$ -test ; Figure  
260 2J, K), suggesting that mGluR2 diffusion is not hindered at synaptic sites. Comparing the  
261 diffusion coefficients of the few axonal SEP-mGluR7 tracks with synaptic tracks showed that  
262 at a subset of synapses the mobility of SEP-mGluR7 is considerably lower inside boutons.  
263 However, we could not detect a significant difference in diffusion coefficient between  
264 synaptic and extrasynaptic SEP-mGluR7 ( $D_{\text{eff}}$  axonal tracks:  $0.069 \pm 0.008 \mu\text{m}^2/\text{s}$ ,  $D_{\text{eff}}$   
265 synaptic tracks:  $0.060 \pm 0.011 \mu\text{m}^2/\text{s}$ ,  $P > 0.05$ , paired  $t$ -test; Figure 2L, M). Taken together,  
266 the FRAP and single-molecule tracking data indicate a striking difference in the dynamic  
267 behavior of presynaptic mGluRs. mGluR2 diffuses seemingly unhindered throughout the  
268 axon, while mGluR7 is largely immobilized, preferentially at presynaptic active zones.

269

## 270 **The intracellular domain of mGluR2 regulates receptor mobility**

271 To gain insight into the structural mechanisms that control the dynamics of presynaptic  
272 mGluRs and to explain the distinct diffusional properties of mGluR2 and mGluR7, we next  
273 sought to identify the receptor domains that are involved in controlling mGluR mobility.  
274 mGluRs consist of three regions: the intracellular domain (ICD) containing a PDZ binding  
275 motif, the prototypical seven-helix transmembrane domain (TMD) involved in G-protein  
276 coupling and the large extracellular domain (ECD) that includes the ligand-binding site  
277 (Niswender and Conn, 2010). First, to unravel which segment of mGluR2 regulates its  
278 mobility, we created three chimeric receptors of mGluR2 by exchanging the ICD, TMD or  
279 ECD domains of mGluR2 with the corresponding domains of mGluR7 to maintain the overall

280 structure of the receptor. All SEP-tagged chimeric mGluR2 variants were targeted to the axon,  
281 similar as wild-type mGluR2, indicating that axonal targeting and surface expression were not  
282 altered by replacing these domains (Figure 3 - figure supplement 3A). Moreover, single-  
283 molecule tracking showed that all chimeric mGluR2 variants displayed rapid diffusion  
284 throughout the axon and presynaptic boutons, similar to wild-type mGluR2 (Figure 3A).  
285 Interestingly though, the mGluR2 chimera containing the ICD of mGluR7 revealed a  
286 significantly higher diffusion coefficient compared to wild-type mGluR2 ( $D_{\text{eff}}$  SEP-mGluR2-  
287 ICD7:  $0.082 \pm 0.003 \mu\text{m}^2/\text{s}$ , SEP-mGluR2:  $0.065 \pm 0.003 \mu\text{m}^2/\text{s}$ ,  $P < 0.005$ , one-way  
288 ANOVA), while exchanging the TMD or ECD did not affect the diffusion kinetics of  
289 mGluR2 ( $D_{\text{eff}}$  SEP-mGluR2-TMD7:  $0.063 \pm 0.004 \mu\text{m}^2/\text{s}$ ; SEP-mGluR2-ECD7:  $0.067 \pm$   
290  $0.003 \mu\text{m}^2/\text{s}$ ,  $P > 0.05$ , one-way ANOVA; Figure 3B). Thus, comparing the diffusional  
291 behavior of this set of chimeric mGluR2 variants indicates that intracellular interactions  
292 mediate mGluR2 mobility in axons.



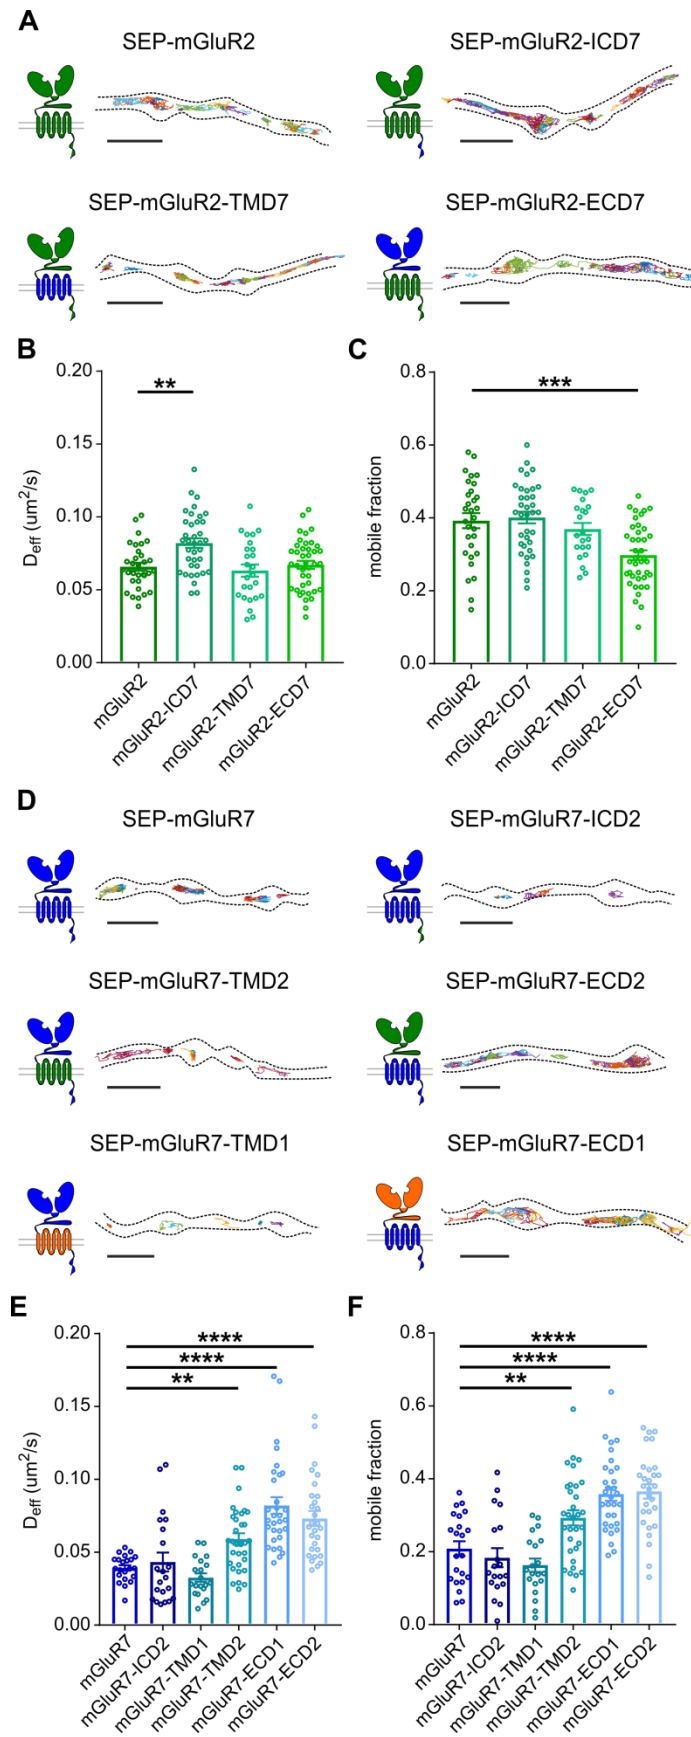

293

294 **Figure 3:** Distinct intra- and extracellular interactions regulate mobility of presynaptic  
295 mGluRs. (A) Schematic diagrams and example trajectories of wild-type and chimeric variants

296 of mGluR2 (green) with the ICD, TMD and ECD exchanged with the corresponding mGluR7  
297 domains (blue). Scale bar, 2  $\mu\text{m}$ . **(B)** and **(C)** Quantification of average diffusion coefficient  
298 ( $D_{\text{eff}}$ ) **(B)** and mobile fraction **(C)** of SEP-tagged chimeric mGluR2 variants ( $n = 30 - 40$  fields  
299 of view from 4 - 5 independent experiments). One-way ANOVA followed by Dunnett's  
300 multiple comparisons test; \*\*  $P < 0.005$ , \*\*\*  $P < 0.0005$ . Error bars represent SEM. **(D)**  
301 Schematic diagrams and example trajectories of wild-type and chimeric variants of mGluR7  
302 (blue) with the ICD, TMD and ECD exchanged with the corresponding domains from  
303 mGluR2 (green) or mGluR1 (orange). Scale bar, 2  $\mu\text{m}$ . **(E)** and **(F)** Quantification of average  
304 diffusion coefficient ( $D_{\text{eff}}$ ) **(E)** and mobile fraction **(F)** of SEP-tagged chimeras of mGluR7  
305 ( $n = 22 - 32$  fields of view from 4 - 5 independent experiments). One-way ANOVA followed  
306 by Dunnett's multiple comparisons test; \*\*  $P < 0.05$ , \*\*\*\*  $P < 0.0005$ . Error bars represent  
307 SEM. All trajectories are displayed with random colors. Outlines of cells are based on TIRF  
308 image of SEP signal.  
309

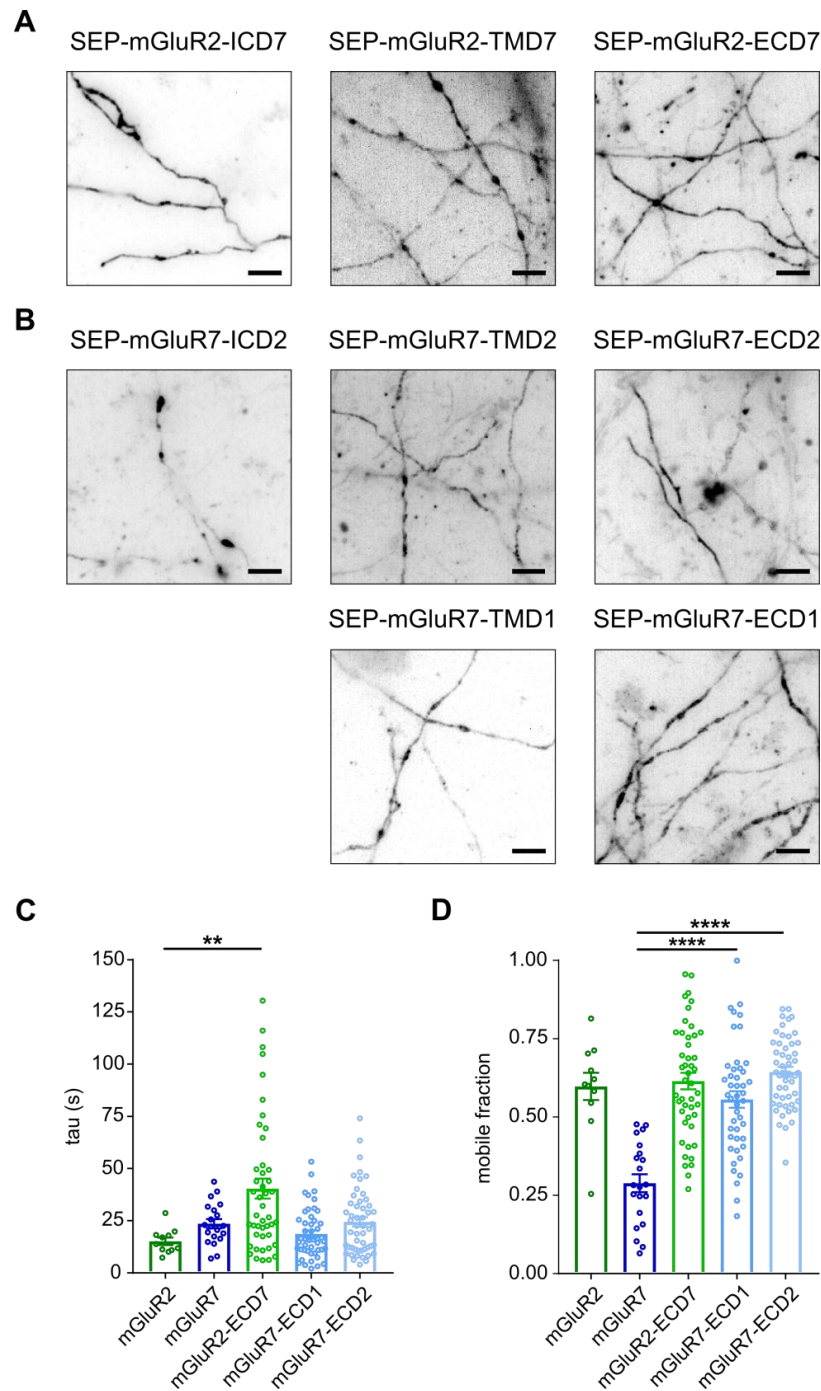

310

311 **Figure supplement 3.** Expression of chimeric variants of presynaptic mGluRs and FRAP  
312 experiments of extracellular chimeric receptors. **(A)** Example images of neurons expressing  
313 SEP-tagged chimeric mGluR2 variants. Scale bar, 5  $\mu\text{m}$ . **(B)** Example images of neurons  
314 expressing SEP-tagged chimeric mGluR7 variants. Scale bar, 5  $\mu\text{m}$ . **(C and D)** Quantification  
315 of half time of fluorescence recovery **(C)** and mobile fraction **(D)** from FRAP experiments of  
316 SEP-tagged extracellular chimeric variants of mGluR2 and mGluR7 (n = 10 - 45 boutons  
317 from 2 - 3 independent experiments). Kruskal-Wallis ANOVA in **(C)**; one-way ANOVA in  
318 **(D)** followed by Dunnett's multiple comparisons test \*\*  $P < 0.05$ , \*\*\*\*  $P < 0.0005$ . Error bars  
319 represent SEM.

320

321

322 **mGluR7 stability at presynaptic active zones is controlled by extracellular interactions**

323 While mGluR2 rapidly diffuses through the axon, we found that mGluR7 is stably anchored  
324 and concentrated at active zones. Therefore, we decided to further focus on the mechanisms  
325 that could underlie the immobilization of mGluR7 at presynaptic sites. To test which region of  
326 mGluR7 is involved in the immobilization of mGluR7 at the active zone, we generated five  
327 chimeric variants of mGluR7 to exchange the ICD, TMD or ECD of mGluR7 with the  
328 corresponding domains of mGluR2 or mGluR1. Because the C-terminal domain of mGluR1 is  
329 involved in targeting the receptor to the dendritic compartment we decided to not substitute  
330 the ICD of mGluR7 for the ICD of mGluR1 (Francesconi and Duvoisin, 2002). All SEP-  
331 tagged chimeric variants of mGluR7 were readily detected in axons, similar to wide-type  
332 mGluR7 (Figure 3 - figure supplement 3B) indicating that these receptors are correctly  
333 targeted to the axonal membrane.

334 In contrast to mGluR2, exchange of the ICD of mGluR7 did not change the diffusional  
335 behavior of the receptor. Trajectory maps obtained from single-molecule tracking showed that  
336 diffusion of the SEP-tagged mGluR7 chimera containing the ICD of mGluR2 was still  
337 restricted to presynaptic boutons (Figure 3D) and the diffusion coefficient ( $D_{\text{eff}}$  SEP-mGluR7-  
338 ICD2:  $0.043 \pm 0.004 \mu\text{m}^2/\text{s}$ , SEP-mGluR7:  $0.039 \pm 0.002 \mu\text{m}^2/\text{s}$ ,  $P > 0.05$ , one-way ANOVA;  
339 Figure 3E) and mobile fraction were similar to wild-type SEP-mGluR7 (mobile fraction SEP-  
340 mGluR7-ICD2:  $0.18 \pm 0.03$ , SEP-mGluR7:  $0.21 \pm 0.02$ ,  $P > 0.05$ , one-way ANOVA; Figure  
341 3F), suggesting that intracellular interactions do not contribute to mGluR7 immobilization.  
342 Diffusion of SEP-tagged TMD chimeric variants of mGluR7 was also mostly restricted to  
343 presynaptic boutons (Figure 3D), although we found that replacing the mGluR7 TMD with  
344 the TMD of mGluR2 slightly increased the diffusion coefficient ( $D_{\text{eff}}$ : SEP-mGluR7-TMD2  
345  $0.059 \pm 0.004 \mu\text{m}^2/\text{s}$ ,  $P < 0.05$ , one-way ANOVA; Figure 3E) and mobile fraction (SEP-  
346 mGluR7-TMD2  $0.29 \pm 0.02$ ,  $P < 0.05$ , one-way ANOVA; Figure 3F). However, substitution of

347 the mGluR7 TMD with the mGluR1 TMD did not alter its diffusional behavior ( $D_{\text{eff}}$  SEP-  
348 mGluR7-TMD1:  $0.033 \pm 0.003 \mu\text{m}^2/\text{s}$ , mobile fraction:  $0.16 \pm 0.02$ ,  $P > 0.05$ , one-way  
349 ANOVA; Figure 3E, F), suggesting that the faster diffusion of the mGluR7 variant containing  
350 the TMD of mGluR2 is most likely due to specific properties of the mGluR2 TMD and cannot  
351 be attributed to a mGluR7-specific mechanism. Indeed, a previous study reported stronger  
352 interactions between transmembrane regions in mGluR2 homodimers compared to other  
353 mGluR subtypes (Gutzeit et al., 2019).

354 Interestingly, replacing the ECD of mGluR7 drastically altered its diffusional  
355 behavior. In contrast to the wild-type receptor, SEP-tagged chimeric mGluR7 variants  
356 containing the ECD of mGluR2 or mGluR1 diffused freely throughout the axon and boutons  
357 (Figure 3D) and displayed almost a two-fold increase in diffusion coefficient ( $D_{\text{eff}}$  SEP-  
358 mGluR7-ECD1:  $0.082 \pm 0.006 \mu\text{m}^2/\text{s}$ , SEP-mGluR7-ECD2:  $0.073 \pm 0.005 \mu\text{m}^2/\text{s}$ ,  $P < 0.0005$ ,  
359 one-way ANOVA; Figure 3E) and larger mobile fraction compared to wild-type SEP-  
360 mGluR7 (SEP-mGluR7-ECD1:  $0.36 \pm 0.02$ , SEP-mGluR7-ECD2:  $0.37 \pm 0.02$ , SEP-mGluR7:  
361  $0.21 \pm 0.02$ ,  $P < 0.0005$ , one-way ANOVA; Figure 3F). Thus, the immobilization of mGluR7  
362 at presynaptic sites likely relies on extracellular interactions with its ECD. To assess if the  
363 ECD of mGluR7 is sufficient to immobilize receptors, we replaced the ECD of mGluR2 with  
364 the ECD of mGluR7. Indeed, we found a significant decrease in the mobile fraction of the  
365 SEP-tagged chimeric mGluR2 variant containing the mGluR7 ECD (SEP-mGluR2-ECD7:  
366  $0.30 \pm 0.02$ , SEP-mGluR2:  $0.39 \pm 0.02$ ,  $P < 0.0005$ , one-way ANOVA; Figure 3C) supporting  
367 the role of the mGluR7 ECD in immobilizing the receptor at synaptic sites. To further  
368 substantiate these results, we performed FRAP experiments and found a significant increase  
369 in fluorescence recovery of SEP-tagged mGluR7 variants with substituted ECDs (Figure 3 -  
370 figure supplement 3D) and slower recovery kinetics of SEP-tagged chimeric mGluR2 with the  
371 ECD of mGluR7 (Figure 3 - figure supplement 3C). These results are in striking agreement

372 with the single-molecule tracking data and confirm the dominant role of the mGluR7 ECD in  
373 regulating receptor mobility.

374

375 **The adhesion molecule ELFN2 interacts with the extracellular domain of mGluR7 in**  
376 ***trans***

377 Given the large contribution of the ECD of mGluR7 to surface mobility, we sought to gain  
378 further insights in the ECD-mediated interactions that could underlie the anchoring of  
379 mGluR7 at presynaptic boutons. It was recently shown that the postsynaptic adhesion  
380 molecules ELFN1 and ELFN2 can interact transsynaptically with mGluR7 and modulate its  
381 activity (Dunn et al., 2019b; Tomioka et al., 2014). Since ELFN1 expression seems restricted  
382 to inhibitory neurons (Stachniak et al., 2019; Sylwestrak and Ghosh, 2012), we hypothesized  
383 that a potential transsynaptic interaction between mGluR7 and the widely expressed ELFN2  
384 (Dunn et al., 2019b) could anchor mGluR7 at presynaptic sites. To further investigate this  
385 hypothesis, we first assessed whether ELFN2 is expressed in hippocampal neurons.  
386 Immunostaining for ELFN2 revealed a punctate distribution pattern (Figure 4 - figure  
387 supplement 4A), with ELFN2-positive puncta co-localizing with the postsynaptic density  
388 marker PSD-95 (Figure 4A, B), adjacent to presynaptic active zones marked by Bsn (Figure  
389 4C, D). Confirming this finding, we obtained similar distribution patterns using endogenous  
390 GFP-tagged ELFN2 (Figure 4 - figure supplement 4B-D). Additionally, we found that  
391 endogenous ELFN2-positive clusters co-localized with mGluR7-positive puncta (Figure 4 -  
392 figure supplement 4E). Then, to test whether mGluR7 can be recruited and clustered by  
393 ELFN2, we co-cultured a population of U2OS cells transfected with mOrange-tagged  
394 mGluR7 with a population of cells expressing ELFN2-GFP to detect possible interactions in  
395 *trans* between these proteins at the junctions between the two populations of transfected cells.  
396 We observed a strong accumulation of both mGluR7 and ELFN2 at the interfaces between

397 cells expressing mOrange-mGluR7 and ELFN2-GFP (Figure 4F). In contrast, we did not find  
398 recruitment of mOrange-mGluR2 to junctions with ELFN2-expressing cells (Figure 4E),  
399 suggesting that trans interactions with ELFN2 can indeed specifically recruit mGluR7, in line  
400 with recent findings (Dunn et al., 2019b). To further investigate if this interaction is mediated  
401 by the extracellular domain of mGluR7, we tested whether replacing the mGluR2 ECD with  
402 the mGluR7 ECD would be sufficient to recruit mGluR2 to the junctions with ELFN2  
403 expressing cells. Indeed, mGluR2 harboring the ECD of mGluR7 was strongly recruited to the  
404 junctions with ELFN2 expressing cells (Figure 4G). These results indicate that ELFN2 can  
405 potently recruit mGluR7 to cellular junctions and that the ECD of mGluR7 is both required  
406 and sufficient for receptor recruitment by ELFN2.

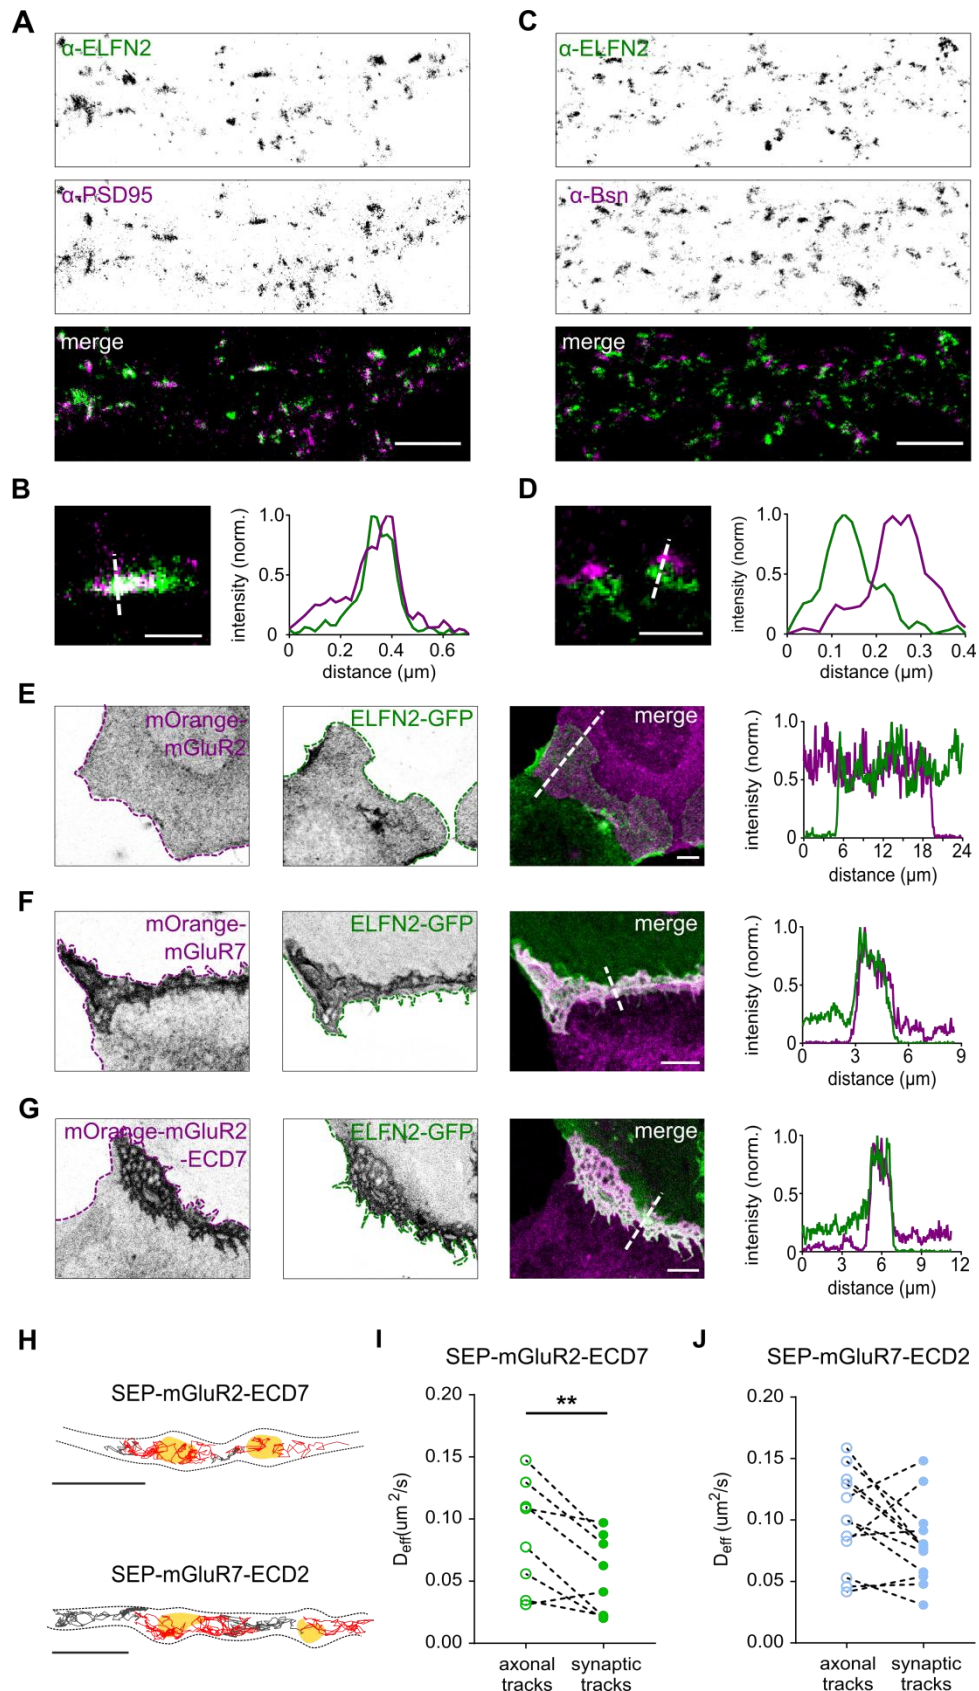

407

408 **Figure 4:** Postsynaptic adhesion molecule ELFN2 interacts with the extracellular domain of  
 409 mGluR7. (A) gSTED image of neuron co-stained with anti-ELFN2 (STAR580) and anti-  
 410 PSD95 (STAR635P). Scale bar, 2  $\mu$ m. (B) Example image and intensity profile of individual  
 411 ELFN2-positive synapse from (A). Scale bar, 500 nm. c gSTED image of neuron co-stained



412 with anti-ELFN2 (STAR580) and anti-Bsn (STAR635P). Scale bar, 2  $\mu\text{m}$ . (D) Example  
413 image and intensity profiles of individual ELFN2 positive synapse from (C) Scale bar, 500  
414 nm. (E - G) Example images of mixed co-cultures of U2OS cells expressing ELFN2-GFP and  
415 mOrange-mGluR2 (E), mOrange-mGluR7 (F), mOrange-mGluR2-ECD7 (G) and normalized  
416 intensity profiles along interface between cells expressing different proteins indicated with  
417 dashed lines. Dotted line - outline of cell. Scale bar, 10  $\mu\text{m}$ . (H) Trajectories of extracellular  
418 chimeras SEP-mGluR2-ECD7 and SEP-mGluR7-ECD2 plotted on the top of mask of  
419 presynaptic bouton. Red tracks - synaptic tracks, grey tracks - axonal tracks, yellow areas -  
420 bouton mask based on Syp-mCherry signal. Scale bar, 2  $\mu\text{m}$ . (I) and (J) Quantification of  
421 diffusion coefficient ( $D_{\text{eff}}$ ) of axonal and synaptic tracks of SEP-mGluR2-ECD7 (I) and SEP-  
422 mGluR7-ECD2 (J) ( $n = 8$  fields of view for SEP-mGluR2-ECD7, 12 fields of view for SEP-  
423 mGluR7-ECD2 from 2 independent experiments). Paired  $t$ -test,  $** P < 0.005$ .  
424

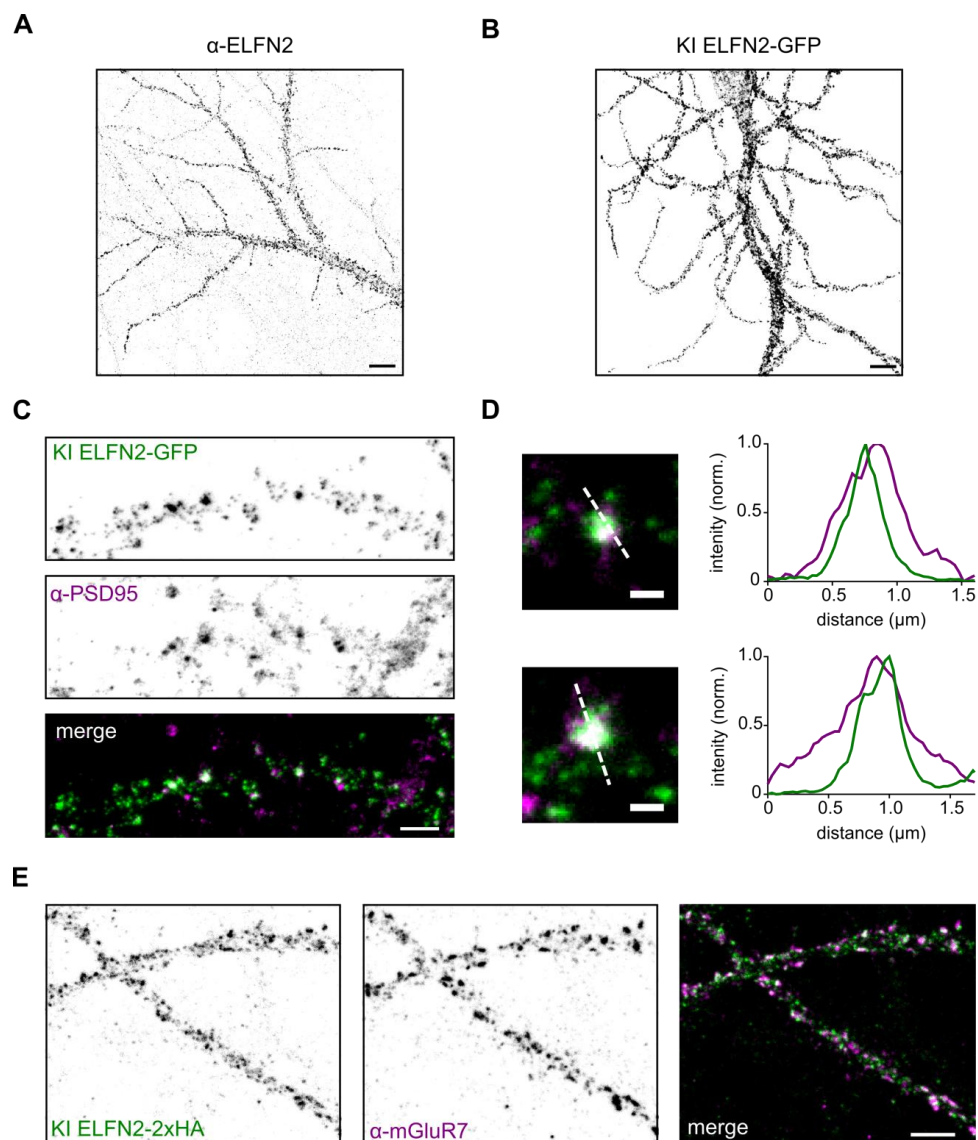

425

426 **Figure supplement 4.** Distribution of ELFN2. (A) Example confocal image of neuron stained  
427 with anti-ELFN2 (STAR580). Scale bar, 10  $\mu\text{m}$ . (B) Example confocal image of ELFN2-GFP  
428 CRISPR/Cas9 knock-in neuron. GFP signal was enhanced with anti-GFP (STAR580). Scale  
429 bar, 10  $\mu\text{m}$  (C) gSTED image of neuron ELFN2-GFP CRISPR/Cas9 knock-in neuron co-  
430 stained with anti-PSD95 (STAR635P). Scale bar, 2  $\mu\text{m}$ . (D) Example images and intensity

431 profiles of individual ELFN2-positive synapses from (C). Scale bar, 500 nm. (E) Confocal  
432 image of ELFN2-2xHA CRISPR/Cas9 knock-in neuron stained with anti-mGluR7  
433 (STAR635P) antibodies. HA-tag was visualized with anti-HA (Alexa Fluor 594) antibodies.  
434 Scale bar, 5  $\mu\text{m}$ .

435

436

### 437 **The extracellular domain of mGluR7 instructs immobilization at the active zone**

438 Based on our findings that the localization of mGluR7 is restricted to the active zone and that  
439 the ECD of mGluR7 can interact with the postsynaptic adhesion molecule ELFN2, we  
440 hypothesized that the ECD of mGluR7 mediates receptor immobilization specifically at  
441 presynaptic sites. To test this hypothesis, we resolved receptor mobility at synapses by co-  
442 expressing ECD chimeric variants of mGluR2 and mGluR7 with Syp1-mCherry (Figure 4H).  
443 Although the mGluR2 chimera containing the ECD of mGluR7 displayed rather high  
444 diffusion coefficients in the axonal shaft (Figure 3B), the pool of chimeric receptors inside  
445 presynaptic boutons showed a significantly lower diffusion coefficient ( $D_{\text{eff}}$  synaptic tracks:  
446  $0.054 \pm 0.011 \mu\text{m}^2/\text{s}$ , axonal tracks:  $0.087 \pm 0.015 \mu\text{m}^2/\text{s}$ ,  $P < 0.005$ , paired  $t$ -test; Figure 4I).  
447 Vice versa, replacing the ECD of mGluR7 for the ECD of mGluR2 resulted in a similar  
448 diffusion coefficient of axonal and synaptic tracks ( $D_{\text{eff}}$  synaptic tracks:  $0.081 \pm 0.01 \mu\text{m}^2/\text{s}$ ,  
449 axonal tracks:  $0.1 \pm 0.01 \mu\text{m}^2/\text{s}$ ,  $P > 0.05$ , paired  $t$ -test; Figure 4J) suggesting that the ECD of  
450 mGluR7 is indeed sufficient to immobilize receptors at presynaptic sites. Altogether, these  
451 results indicate that mGluR7 immobilization at synaptic sites is in large part mediated by  
452 extracellular interactions.

453

### 454 **Surface mobility of presynaptic mGluRs is not altered by synaptic activity**

455 Our results so far suggest that, under resting conditions, the diffusional properties of  
456 presynaptic mGluRs are largely controlled by distinct intra- and extracellular interactions.  
457 However, ligand-induced activation of GPCRs involves a dramatic change in receptor  
458 conformation, and has been shown to change the oligomerization and diffusion behavior of

459 various GPCRs, including mGluRs, in non-neuronal cells (Calebiro et al., 2013; Kasai and  
460 Kusumi, 2014; Sungkaworn et al., 2017; Yanagawa et al., 2018). To test whether receptor  
461 activation alters the diffusion of presynaptic mGluRs in neurons, we performed single-  
462 molecule tracking of mGluR2 and mGluR7 before and after stimulation with their specific  
463 agonists. We found that activation of SEP-mGluR2 with the potent agonist LY379268 (LY)  
464 did not change the distribution of receptor trajectories (Figure 5A) or diffusion coefficients  
465 ( $D_{\text{eff}}$  control:  $0.06 \pm 0.003 \mu\text{m}^2/\text{s}$ , LY:  $0.058 \pm 0.004 \mu\text{m}^2/\text{s}$ ,  $P > 0.05$ , paired  $t$ -test; Figure 5B).  
466 Similarly, direct activation of mGluR7 with the potent group III mGluR agonist L-AP4 also  
467 did not change the diffusional behavior of SEP-mGluR7 ( $D_{\text{eff}}$  control:  $0.044 \pm 0.002 \mu\text{m}^2/\text{s}$ , L-  
468 AP4:  $0.045 \pm 0.003 \mu\text{m}^2/\text{s}$ ;  $P > 0.05$ , paired  $t$ -test; Figure 5C, D). Thus, these experiments  
469 indicate that in neurons, the dynamics of presynaptic mGluRs are not modulated by agonist-  
470 stimulated receptor activation.

471 Changes in neuronal activity could alter receptor mobility, either directly by receptor  
472 stimulation by their endogenous ligand glutamate, or perhaps indirectly through structural  
473 changes in synapse organization. To test this, we next determined whether strong synaptic  
474 stimulation by application of the potassium channel blocker 4-AP together with the glutamate  
475 reuptake blocker TBOA, to increase synaptic glutamate levels, changed receptor diffusion.  
476 However, we did not find a significant effect of synaptic stimulation on the diffusion  
477 coefficient of SEP-mGluR2 ( $D_{\text{eff}}$  control:  $0.085 \pm 0.011 \mu\text{m}^2/\text{s}$ , 4-AP + TBOA:  $0.069 \pm 0.009$   
478  $\mu\text{m}^2/\text{s}$ ,  $P > 0.05$ , paired  $t$ -test; Figure 5 - figure supplement 5A, B). Additionally, even under  
479 strong depolarizing conditions (25 mM  $\text{K}^+$ , 5 - 10 min), the diffusion coefficient of SEP-  
480 mGluR2 remained unaltered ( $D_{\text{eff}}$  control:  $0.082 \pm 0.005 \mu\text{m}^2/\text{s}$ , 25 mM  $\text{K}^+$ :  $0.074 \pm 0.008$   
481  $\mu\text{m}^2/\text{s}$ ,  $P > 0.05$ , paired  $t$ -test; Figure 5E, F). We found similar results for SEP-mGluR7 (data  
482 not shown). However, since the affinity of mGluR7 for glutamate is very low, in the range of  
483 0.5 - 1 mM (Schoepp et al., 1999), we reasoned that the unaltered diffusion of mGluR7 during

484 synaptic stimulation could be due to the incomplete activation of the receptor. Therefore, we  
485 analyzed the mobility of an mGluR7 mutant with a two-fold increased affinity for glutamate  
486 (mGluR7-N74K) (Kang et al., 2015) during strong depolarization. Importantly, we found that  
487 the diffusion rate of SEP-mGluR7-N74K was not significantly different from wild-type SEP-  
488 mGluR7 under control conditions ( $D_{\text{eff}}$  SEP-mGluR7-N74K:  $0.049 \pm 0.005 \mu\text{m}^2/\text{s}$ , SEP-  
489 mGluR7:  $0.039 \pm 0.002 \mu\text{m}^2/\text{s}$ ,  $P > 0.05$ , unpaired *t*-test; Figure 5 - figure supplement 5C-E).  
490 However, despite having a two-fold higher affinity for glutamate, the diffusion kinetics of  
491 SEP-mGluR7-N74K remained unaltered under strong depolarizing conditions ( $D_{\text{eff}}$  control:  
492  $0.056 \pm 0.006 \mu\text{m}^2/\text{s}$ , 25 mM  $\text{K}^+$ :  $0.044 \pm 0.007 \mu\text{m}^2/\text{s}$ ,  $P > 0.05$ , paired *t*-test; Figure 5G, H).  
493 Altogether, these single-molecule tracking experiments demonstrate that the lateral diffusion  
494 of presynaptic mGluRs on the axonal membrane is not modulated by direct activation with  
495 ligands, or acute changes in neuronal activity.

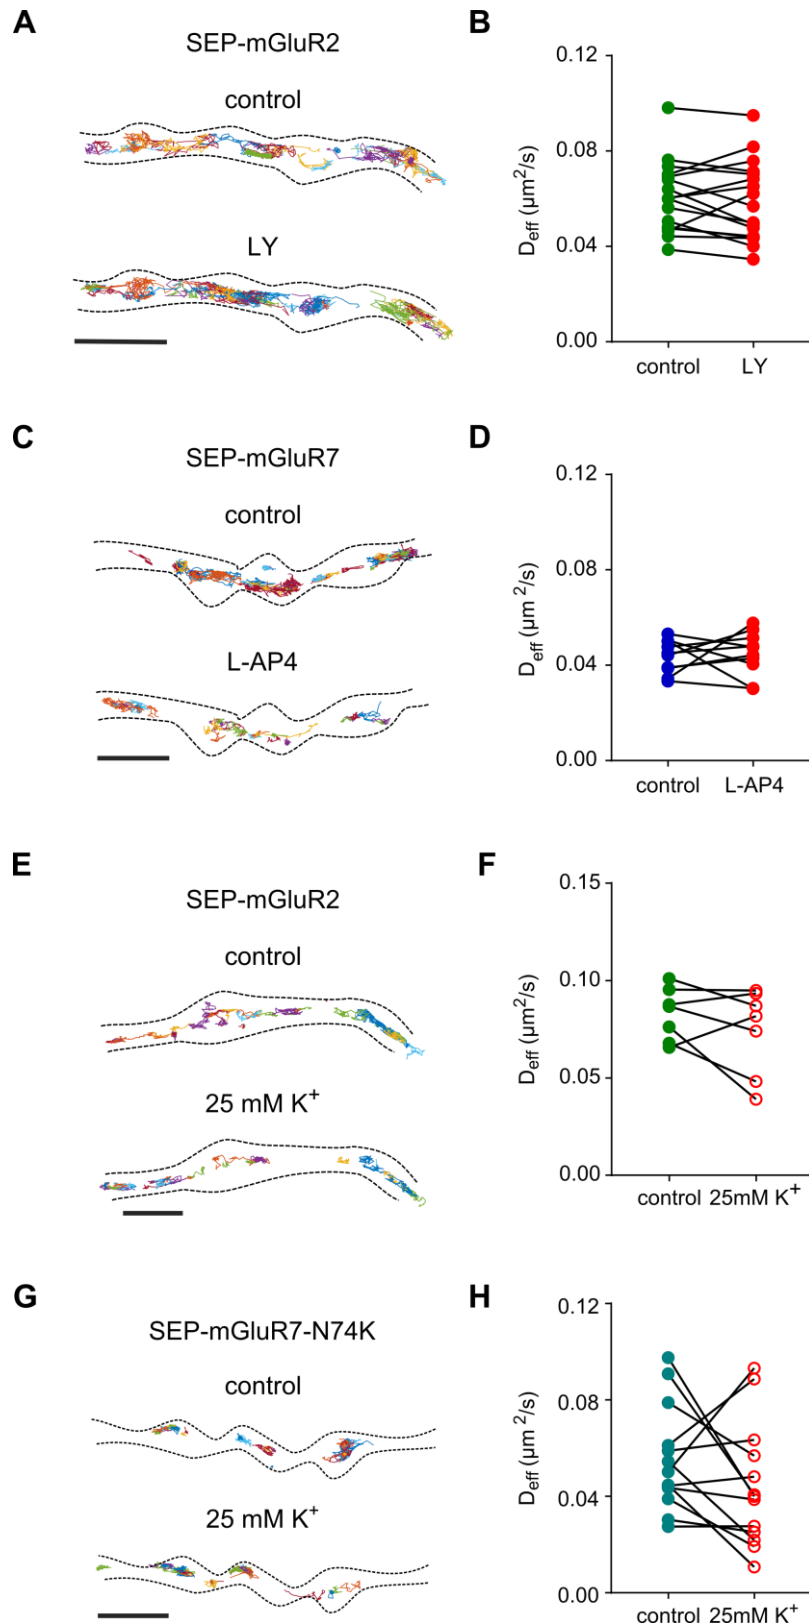

496

497 **Figure 5.** Dynamics of presynaptic mGluRs is not regulated by activity. (A) Example  
498 trajectories of SEP-mGluR2 before and after incubation with 100  $\mu\text{M}$  LY. Scale bar, 2  $\mu\text{m}$ .  
499 (B) Quantification of diffusion coefficient ( $D_{\text{eff}}$ ) of SEP-mGluR2 before and after incubation  
500 with LY (n = 17 fields of view from 2 independent experiments). (C) Example trajectories of  
501 SEP-mGluR7 before and after incubation with 500  $\mu\text{M}$  L-AP4. Scale bar, 2  $\mu\text{m}$ .

502 **(D)** Quantification of diffusion coefficient ( $D_{\text{eff}}$ ) of SEP-mGluR7 before and after incubation  
503 with L-AP4 (n = 10 fields of view from 2 independent experiments). **(E)** Example tracks of  
504 SEP-mGluR2 before and after incubation with 25 mM  $K^+$ . Scale bar, 2  $\mu\text{m}$ . **(F)** Quantification  
505 of diffusion coefficient ( $D_{\text{eff}}$ ) of SEP-mGluR2 before and after incubation with 25 mM  $K^+$   
506 (n = 7 fields of view from 2 independent experiments). **(G)** Example tracks of SEP-mGluR7-  
507 N74K before and after incubation with 25 mM  $K^+$ . Scale bar, 2  $\mu\text{m}$ . **(H)** Quantification of  
508 diffusion coefficient ( $D_{\text{eff}}$ ) of SEP-mGluR7-N74K before and after incubation and with  
509 25 mM  $K^+$  (n = 13 fields of view from 2 independent experiments). All trajectories are  
510 displayed with random colors. Outlines of cells are based on TIRF image of SEP signal.  
511

512

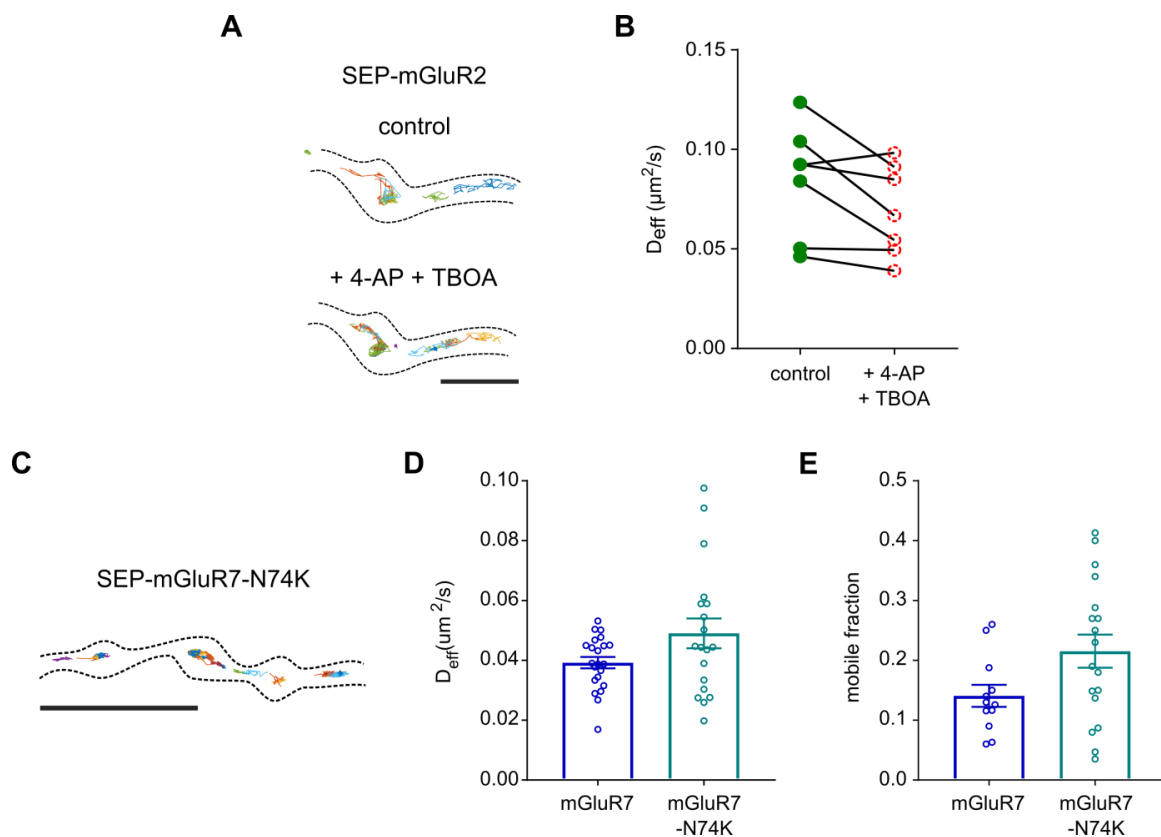

513

514 **Figure supplement 5.** Mobility of presynaptic mGluR2 does not depend of neuronal activity  
515 and high-affinity mutant of mGluR7 displays similar mobility as wild-type receptor. **(A)**  
516 Example tracks of SEP-mGluR2 before and after incubation with 200  $\mu\text{M}$  4-AP and  
517 10  $\mu\text{M}$  TBOA. Scale bar, 2  $\mu\text{m}$ . **(B)** Quantification of diffusion coefficient ( $D_{\text{eff}}$ ) of SEP-  
518 mGluR2 before and after incubation with 4-AP and TBOA (n = 7 fields of view from 2  
519 independent experiments). **(C)** Example trajectories of SEP-mGluR7-N74K.. Scale bar, 5  $\mu\text{m}$ .  
520 **(D and E)** Quantification of average diffusion coefficient ( $D_{\text{eff}}$ ) **(D)** and mobile fraction **(E)** of  
521 SEP-mGluR7 and mutant SEP-mGluR7-N74K (n = 22 fields of views for SEP-mGluR7,  
522 19 fields of view for SEP-mGluR7-N74K from 2 independent experiments). Trajectories are  
523 displayed with random colors. Outlines of cells is based on TIRF image of SEP signal. Error  
524 bars represent SEM.  
525

526 **Computational model of presynaptic mGluR activation reveals that different levels of**  
527 **receptor activation depend on subsynaptic localization**

528 Our data show that mGluR7 is immobilized at the active zone, close to the release site, while  
529 mGluR2 is distributed along the axon and synaptic boutons, seemingly excluded from the  
530 active zone. Moreover, their localization and dynamics did not change upon synaptic activity.  
531 We hypothesized that these distinct distribution patterns differentially influence the  
532 contribution of presynaptic mGluRs to the modulation of synaptic transmission. To test this  
533 hypothesis, we investigated a computational model of presynaptic mGluR activation  
534 combining the cubic ternary complex activation model (cTCAM) of GPCRs signaling (Figure  
535 6B) (Kinzer-Ursem and Linderman, 2007) with a model of time-dependent diffusion of  
536 glutamate release after single synaptic vesicle (SV) fusion or multi-vesicle release at different  
537 frequencies. To determine the effect of mGluR localization, we compared receptor activation  
538 at varying distances (5 nm to 1  $\mu\text{m}$ ) from the release site (Figure 6A). We calibrated the  
539 activation model of mGluR2 and mGluR7 by solving cTCAM with different values of  
540 association constant ( $K_a$ ), keeping other parameters constant (Table supplement 1), to match  
541 the model outputs: the relative number of receptor-ligand complexes (Figure 6C) and the  
542  $G_{\alpha\text{GTP}}$  concentration (Figure 6D) with previously published  $EC_{50}$  values for mGluR2 and  
543 mGluR7 (Schoepp et al., 1999). Because two out of four liganded receptor states in the  
544 cTCAM represent an inactive receptor, we used the  $G_{\alpha\text{GTP}}$  concentration as a readout of  
545 receptor activation to compare responses of mGluRs to different synaptic activity patterns.

546 The release of glutamate from a single SV, representing release during spontaneous  
547 synaptic activity, caused only a slight increase in the activation of mGluR2 when located  
548 close to the release site ( $r = 5$  nm) and outside the active zone ( $r \geq 100$  nm, Figure 6E and  
549 Figure 6 - figure supplement 6A). Release of 10 SVs, corresponding to the size of the readily  
550 releasable pool, at low frequency (5 Hz) increased the activity of mGluR2 almost 2-fold

551 inside presynaptic boutons ( $r \leq 500$  nm; Figure 6E and Figure 6 - figure supplement 6B).  
552 Elevation of the fusion frequency to 20 Hz further increased receptor activation to ~2.3-fold  
553 of basal activity (Figure 6E and Figure 6 - figure supplement 6C). Together, these data  
554 suggest that mGluR2 is activated during moderate synaptic stimulation patterns, in line with  
555 an earlier study suggesting use-dependent activation of group II mGluRs (Scanziani et al.,  
556 1997). Surprisingly, for all patterns of synaptic activity, levels of mGluR2 activation were  
557 almost identical next to the release site ( $r = 5$  nm) and at the edge of the active zone ( $r = 100$   
558 nm) and only slowly decreased with increasing distance from the active zone ( $r > 100$  nm,  
559 Figure 6E). These results suggest that mGluR2 is efficiently activated, even at further  
560 distances from the release site, and its activation is only loosely coupled to release site  
561 location. This finding is in line with the localization of mGluR2 along the axon and inside  
562 presynaptic bouton but not inside the active zone.

563 In contrast, mGluR7, having a distinctively low affinity for glutamate, was not  
564 efficiently activated by the release of single SV, even when positioned close to the release  
565 site. At  $r = 5$  nm, we found less than 0.3% change in activation compared to basal receptor  
566 activity (Figure 6F and Figure 6 - figure supplement 6D). Release of 10 SVs at 5 Hz caused a  
567 relatively small increase (~ 1.5%) in mGluR7 activity (Figure 6F and Figure 6 - figure  
568 supplement 6E). However, fusion of the same number of SVs at higher frequency (20 Hz)  
569 almost doubled mGluR7 response to glutamate (~ 2.6% increase of  $G_{\alpha\text{GTP}}$  concentration at  $r =$   
570 5 nm, Figure 6 - figure supplement 6F) suggesting that the level of mGluR7 activation  
571 strongly depends on the frequency of release and the peak of maximal glutamate  
572 concentration in the cleft. Additionally, the activity profiles of mGluR7 further away from the  
573 release site showed a striking reduction in mGluR7 response indicating that mGluR7  
574 activation is mostly restricted to locations close release sites (Figure 6F). Altogether, these  
575 data indicate that mGluR7 is involved in modulation of synaptic transmission only during



576 repetitive, high-frequency release and its localization at the active zone close to the release

577 site is curtail for its function.

578

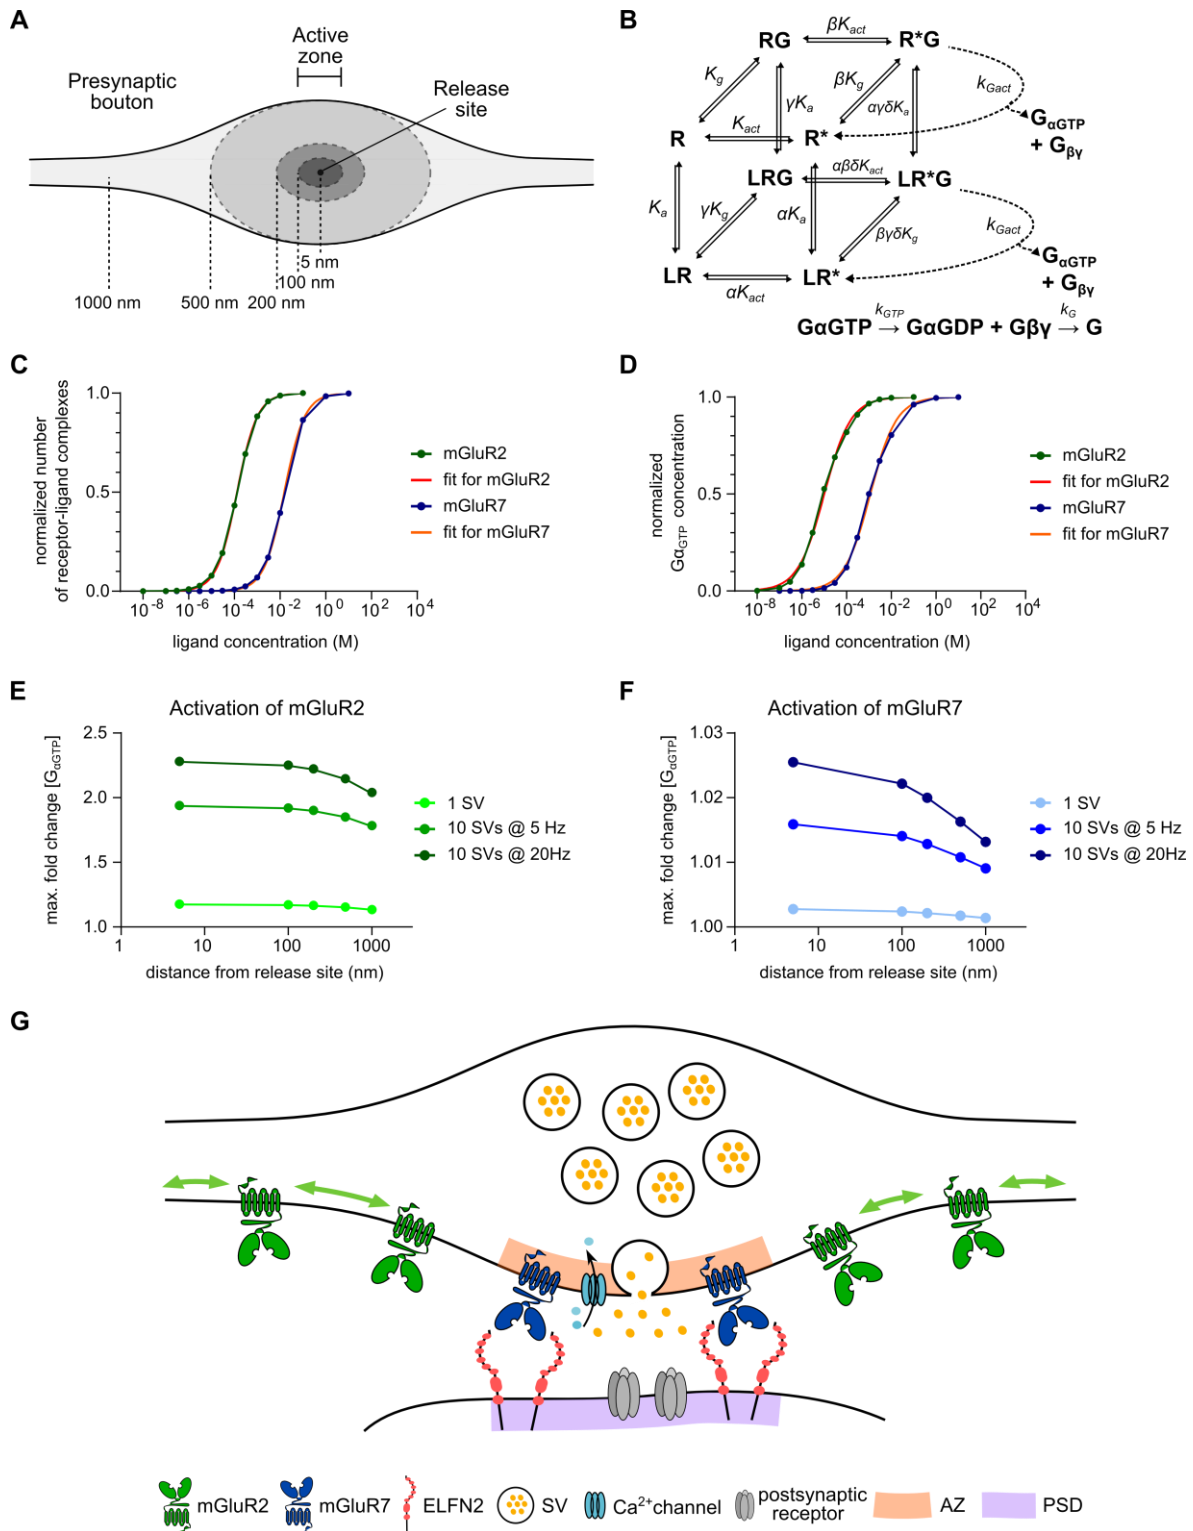

579

580 **Figure 6.** Computational model of mGluRs activation shows that subsynaptic localization of  
581 presynaptic mGluRs tunes receptor activation. (A) Schematic of presynaptic bouton

582 highlighting subsynaptic localizations used in modeling. **(B)** Kinetics and rate equations  
583 described in the cubic ternary complex activation model of presynaptic mGluRs signaling. All  
584 parameters used in the model are summarized in Table supplement 1. **(C)** and **(D)** Calibration  
585 of model to match output the number of receptor - ligand complexes **(C)** and  $G_{\alpha GTP}$   
586 concentration **(D)** with reported  $EC_{50}$  values for mGluR2 and mGluR7. **(E)** and **(F)** Receptor  
587 response to glutamate release during different release pattern (1 SV, 10 SVs at 5 Hz and 10  
588 SVs at 20 Hz) at different distances from release site (5 nm to 1  $\mu$ m) for mGluR2 **(E)** and  
589 mGluR7 **(F)**. Note that x axis is on a logarithmic scale. **(G)** Model of subsynaptic distribution  
590 and mobility of presynaptic mGluRs. mGluR2 is distributed along the axon and displays high  
591 mobility that is modulated by its intracellular interactions. mGluR7 is enriched and  
592 immobilized at the active zone. Immobilization of mGluR7 is regulated by its extracellular  
593 domain that transsynaptically interacts with the postsynaptic adhesion molecule ELFN2. SV -  
594 synaptic vesicle, AZ - the active zone, PSD - the postsynaptic density.  
595  
596

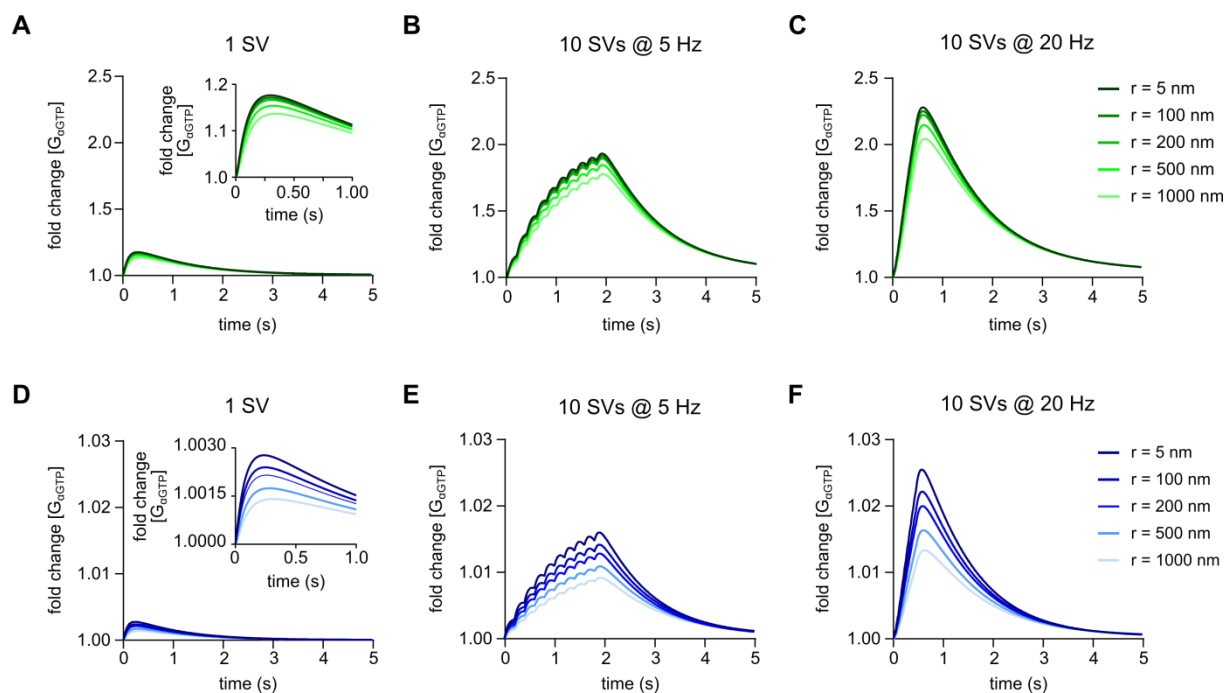

597

598 **Figure supplement 6.** mGluR2 activation is loosely coupled to the distance to the release  
599 site, while mGluR7 activation is restricted to close proximity of the release site. **(A - C)** Time  
600 courses of mGluR2 response to glutamate after release of 1 SV **(A)**, 10 SVs at 5 Hz **(B)** and  
601 10 SVs at 20 Hz **(C)** at different distances from the release site. **(D - F)** Time courses of  
602 mGluR7 response to glutamate after release of 1 SV **(D)**, 10 SVs at 5 Hz **(E)** and 10 SVs at 20  
603 Hz **(F)** at different distances from the release site.  
604

## 605 **DISCUSSION**

606 Despite the functional importance of presynaptic mGluRs in modulating the efficacy of  
607 synaptic transmission, the mechanisms that control their dynamic distribution at excitatory  
608 synapses remain poorly understood. Here, we provide new insights in the molecular  
609 mechanisms that determine the spatial distribution and mobility of presynaptic mGluRs  
610 (Figure 6G). We observed that presynaptic mGluR subtypes display striking differences in  
611 their subsynaptic localization and dynamics that are controlled by distinct structural  
612 mechanisms. We identified that the extracellular domain of mGluR7 is critical for  
613 immobilization of the receptor at presynaptic sites, which is likely mediated by transsynaptic  
614 interactions with the postsynaptic adhesion molecule ELFN2. Finally, a computational model  
615 of receptor activation showed that mGluR2 activation is only loosely coupled to release site  
616 location. In contrast, even when placed immediately next to the release site, there is only  
617 modest activation of mGluR7 by physiologically relevant synaptic stimulation patterns.

618 Mapping the precise distribution of presynaptic mGluRs is essential for understanding  
619 how these receptors contribute to synaptic transmission. In particular, the location relative to  
620 the release site is predicted to influence the probability of receptor activation and ability to  
621 trigger local downstream effectors. We found that while mGluR2 was distributed along the  
622 axon and in synaptic boutons it was largely excluded from the active zone. In contrast, we  
623 found that mGluR7 was highly enriched at the presynaptic active zone, close to the release  
624 site of synaptic vesicles. This is in line with earlier immuno-EM studies that showed that  
625 mGluR2 is present in the preterminal part of axons, but rarely found in boutons (Shigemoto et  
626 al., 1997), and that group III mGluRs, including mGluR7, are almost exclusively localized in  
627 the presynaptic active zone (Shigemoto et al., 1997, 1996; Siddig et al., 2020). Interestingly,  
628 these differences in localization were reflected in the surface diffusion behavior of these  
629 receptors. mGluR2 was highly mobile throughout the axon and within boutons, similar to

630 other presynaptic receptors such as the cannabinoid type 1 receptor (CB1R) (Mikasova et al.,  
631 2008) and the mu-type opioid receptor (MOR) (Jullié et al., 2020). In contrast to these mobile  
632 receptors however, diffusion of mGluR7 was almost exclusively restricted to presynaptic  
633 boutons. Such differences in the distribution of presynaptic receptors are likely associated  
634 with their function and may provide a means for synapses to spatially and temporally  
635 compartmentalize receptor signaling.

636 The differences in the distance of these mGluR2 and mGluR7 to the release site  
637 implies that these receptors respond differentially to synaptic activity. Indeed, our  
638 computational modeling studies indicate that mGluR2 activation is only loosely coupled to  
639 release site location, while mGluR7 activation is limited, even when placed in immediate  
640 proximity to the release site. These two receptor types might thus encode different modes of  
641 synaptic activity patterns: mGluR2 responding to lower frequency stimulation patterns, and  
642 mGluR7 being activated only during intense, high-frequency synaptic stimulation. It has been  
643 suggested that group III mGluRs act as auto-receptors during repetitive stimulations and  
644 modulate release probability (Billups et al., 2005; Pinheiro and Mulle, 2008). On the other  
645 hand, it has been described that mGluR7 is constitutively active (Dunn et al., 2018;  
646 Kammermeier, 2015; Stachniak et al., 2019), and that activity of mGluR7 is regulated by the  
647 transsynaptic interaction with ELFN2 at excitatory synapses (Dunn et al., 2019a; Stachniak et  
648 al., 2019). Allosteric modulation of mGluR7 by ELFN2 could thus decrease the threshold for  
649 receptor activation or increase its basal activity. Moreover, in our model we assumed a  
650 homogenous distribution of G-proteins inside the presynaptic bouton. However, we cannot  
651 exclude the possibility that at the active zone there is a higher local concentration of  $G\alpha$ , or  
652 that mGluR7 has a higher affinity for G-proteins than mGluR2. Thus, activation of mGluR7  
653 could result in stronger activation of downstream signaling pathway and larger effect on  
654 synaptic transmission. Nevertheless, the results from our computational model indicate that

655 mGluR7 positioning relative to the release site is a critical factor increasing the probability of  
656 receptor activation.

657         The spatial segregation of mGluRs in presynaptic boutons could also be a mechanism  
658 to compartmentalize the downstream effectors of these receptors. Both mGluR2 and mGluR7  
659 couple to inhibitory  $G\alpha_i$  proteins that repress adenylyl cyclase activity, decreasing cAMP  
660 production. Indeed, these receptors have overlapping downstream signaling proteins such as  
661 PKA and PKC, and are both described to modulate calcium channel activity (de Jong and  
662 Verhage, 2009; Ferrero et al., 2013; Martín et al., 2007; Robbe et al., 2002). But, mGluR7 has  
663 also been suggested to interact with several other components of the active zone, such as  
664 RIM1a (Pelkey et al., 2008), and Munc-13 (Martín et al., 2010). The selective effects of these  
665 receptors might thus be explained by their segregated distribution. One of the principal  
666 mechanisms of synaptic depression that is shared by these receptors, involves the interaction  
667 between the membrane-anchored  $\beta\gamma$  subunits of the G-protein with voltage-gated  $Ca^{2+}$   
668 channels (VGCC) (Kammermeier, 2015; Niswender and Conn, 2010). An important rate-  
669 limiting factor in this mechanism is probably the distance between the  $G_{\beta\gamma}$  subunits and  
670 VGCCs. It could thus be envisioned that the effect of mGluR2 activation on synaptic  
671 transmission would not be instantaneous but would be delayed by the diffusion time of  $\beta\gamma$   
672 subunits to VGCCs enriched at the active zone. For mGluR7 on the other hand, being  
673 immobilized in close proximity to release sites, the inhibition of VGCCs might occur much  
674 more instantaneously after receptor activation. Altogether, our data indicate that the specific  
675 modulatory effects of presynaptic mGluRs on synaptic transmission are in large part  
676 determined by their differential localization relative to the release site and their distinct  
677 surface diffusion properties.

678         Given the distinct distribution and diffusion properties of mGluR2 and mGluR7, we  
679 speculated that distinct mechanisms control the surface mobility of these receptors. Both C-

680 terminal regions of mGluR2 and mGluR7 contain PDZ binding motifs, but of different types,  
681 mGluR2 contains a class I, and mGluR7 a class II binding motif (Hirbec et al., 2002)  
682 indicating specific intracellular interaction for each of presynaptic mGluRs. Our data indeed  
683 suggest that intracellular interactions mediated by the C-terminal region of mGluR2 regulate  
684 receptor diffusion. However, little is known about mGluR2 C-tail-mediated interactions and  
685 molecular mechanisms engaged in controlling mGluR2 diffusion remain to be elucidated.  
686 Also for mGluR7 it has been suggested that stable surface expression and clustering in  
687 presynaptic boutons is controlled by the intracellular interaction with the PDZ-domain  
688 containing scaffold protein PICK1 (Boudin et al., 2000; Suh et al., 2008). In contrast, another  
689 study showed that the synaptic distribution of an mGluR7 mutant lacking the PDZ binding  
690 motif was unaltered (Zhang et al., 2008). Our findings that the intracellular domain of  
691 mGluR7 does not contribute to receptor clustering and immobilization at presynaptic boutons  
692 are consistent with this, further suggesting that interactions with PICK1 could be important  
693 for mGluR7 function but do not instruct receptor localization. Rather, we found an  
694 unexpected role of the extracellular domain of mGluR7 in its immobilization at presynaptic  
695 plasma membrane. Chimeric mGluR7 variants with substituted ECDs displayed higher  
696 diffusion coefficients than wild-type mGluR7 and surface diffusion was no longer restricted  
697 to the presynaptic bouton but was virtually unrestricted along the axon. Our data thus suggest  
698 that extracellular interactions can efficiently cluster the receptor and that the extracellular  
699 domain of mGluR7 is essential for immobilizing and concentrating the receptor at active  
700 zones.

701 The dramatic effect of replacing the extracellular domain of mGluR7 on localization  
702 and diffusion suggests that transsynaptic interactions effectively concentrate mGluR7 at  
703 synaptic sites. This is strikingly consistent with the emerging notion that transcellular  
704 interactions greatly impact GPCR biology (Dunn et al., 2019a). Specifically for group III

705 mGluRs, interactions with the adhesion molecules ELFN1 and ELFN2 have been found to  
706 modulate the functional properties of these receptors and potently impact synaptic function  
707 (Dunn et al., 2019b, 2018; Sylwestrak and Ghosh, 2012; Tomioka et al., 2014). Here, we  
708 provide direct evidence that in hippocampal neurons ELFN2 is present in the PSD, adjacent to  
709 the presynaptic active zone where mGluR7 is located. Our experiments further showed that  
710 ELFN2 can efficiently recruit mGluR7 to intercellular boundaries and that this recruitment is  
711 mediated by the ECD of mGluR7. Together with the pronounced role of the mGluR7 ECD in  
712 immobilizing the receptor at synaptic sites, we propose that mGluR7 is concentrated at the  
713 active zone by transsynaptic interactions with ELFN2. This specific interaction might then  
714 also explain the targeting and clustering of mGluR7 to specific subsets of synapses  
715 (Shigemoto et al., 1996). Collectively, the transsynaptic interaction with ELFN2 thus seems to  
716 be critical for anchoring mGluR7 at specific synaptic sites while simultaneously regulating  
717 receptor activity via allosteric modulation.

718         Previous studies have suggested that ligand-induced GPCR activation, alters their  
719 surface diffusion and oligomerization properties (Calebiro et al., 2013; Kasai and Kusumi,  
720 2014; Sungkaworn et al., 2017; Yanagawa et al., 2018). In heterologous cells the diffusion  
721 rate of many GPCRs, including mGluR3 for instance, are significantly reduced after agonist  
722 stimulation (Yanagawa et al., 2018). Surprisingly, our data in neurons indicate that the surface  
723 mobility of mGluRs is not altered by agonist-induced receptor activation, or acute changes in  
724 neuronal activity. Diffusion in the plasma membrane of heterologous cells is likely influenced  
725 by other factors than in neuronal membranes. Most notably, the unique membrane  
726 composition and expression of cell-type specific interaction partners in neurons are likely to  
727 differentially tune the diffusional properties of individual receptors. Indeed, the mobility of  
728 the CB1R in the axon decreases after desensitization (Mikasova et al., 2008), while the  
729 mobility of another GPCR, MOR does not change after agonist stimulation (Jullié et al.,

730 2020). Our data indicate that for the presynaptic mGluRs, mGluR2 and mGluR7, structural  
731 factors, such as interactions with intra- and extracellular components predominantly instruct  
732 receptor localization, and that these mechanisms act independently of the receptor activation  
733 status. This has potentially important implications for the contribution of these receptors to  
734 the regulation of synaptic transmission. mGluR7 is likely to exert its effects very locally,  
735 restricted to individual synapses. For mGluR2 on the other hand, it could be speculated that  
736 the unchanged, high surface mobility of mGluR2 after activation allows the receptor to  
737 activate downstream effectors over larger areas, as has been suggested for the opioid receptor  
738 (Jullié et al., 2020). This would imply that, once activated, mGluR2 could spread its effects to  
739 neighboring synapses and dampen transmission much more globally than mGluR7 does. We  
740 can of course not exclude that only a small, undetectable subpopulation of activated mGluRs  
741 is immobilized at specific locations, but given that the threshold for mGluR2 activation is  
742 relatively low, it seems likely that the effects of mGluR2 activation are much more  
743 widespread than mGluR7. This could also imply that activity of mGluR2 not only modulates  
744 synaptic transmission, but perhaps also controls other axonal processes such as protein  
745 synthesis, cargo trafficking, or cytoskeleton reorganization.

746 In conclusion, we identified novel regulatory mechanisms that differentially control  
747 the spatial distribution and dynamics of presynaptic glutamate receptors, that have important  
748 implications for how these receptors can contribute to the modulation of synaptic  
749 transmission. The co-existence of various other and distinct receptor types at presynaptic sites  
750 likely provides flexibility and allows synapses to differentially respond to incoming  
751 stimulation patterns. Defining the molecular mechanisms that control the dynamic spatial  
752 distribution of these receptors will be important to further our understanding of synaptic  
753 modulation.

754



755 **MATERIALS AND METHODS**

756

757 **Animals**

758 All experiments required animals were approved by the Dutch Animal Experiments  
759 Committee (Dier Experimenten Commissie [DEC]). All animals were treated in accordance  
760 with the regulations and guidelines of Utrecht University, and conducted in agreement with  
761 Dutch law (Wet op de Dierproeven, 1996) and European regulations (Directive 2010/63/EU).

762

763 **Antibodies and reagents**

764 In this study the following primary antibodies were used: mouse anti-Bassoon (1:500 dilution,  
765 Enzo, #ADI-VAM-PS003-F, RRID AB\_10618753); rabbit anti-ELFN2 (1:100 dilution, Atlas  
766 Antibody, #HPA000781, RRID AB\_1079280); rabbit anti-GFP (1:2000 dilution, MBL  
767 Sanbio, #598, RRID AB\_591819); rat anti-HA (1:400 dilution, Sigma, #11867423001, RRID  
768 AB\_390919); rabbit anti-mGluR2/3 (1:50 dilution, EMD Millipore, #AB1553, RRID  
769 AB\_90767); rabbit anti-mGluR7 (1:100 dilution, Merck Millipore, #07-239, RRID  
770 AB\_310459); mouse anti-PSD95 (1:400 dilution, Neuromab, #75-028, RRID AB\_2307331)  
771 and anti-GFP nanobodies conjugated with ATTO647N (1:15000 dilution, GFPBooster-  
772 ATTO647N, Chromotek, #gba647n). The following secondary antibodies were used: goat  
773 Abberior STAR580-conjugated anti-rabbit (1:200 dilution, Abberior GmbH, #2-0012-005-8);  
774 goat Abberior STAR635P-conjugated anti-mouse (1:200 dilution, Abberior GmbH, #2-0002-  
775 007-5) and goat Alexa Fluor594-conjugated anti-rat (1:200 dilution, Life Technologies, #A-  
776 11007). The following chemical reagents were used: 4-aminopyridine (4-AP, TOCRIS, #940),  
777 DL-TBOA (TOCRIS, #1223), L-AP4 (TOCRIS, #0103), and LY379268 (TOCRIS, #2453).

778

779

## 780 DNA plasmids

781 The SEP-mGluR2, ELFN2-GFP and ELFN2-2xHA CRISPR/Cas9 knock-in constructs were  
782 designed as described in (Willems et al., 2020). SEP tag was inserted into exon 2 of *Grm2*  
783 gene using following target sequence: 5'-AGGGTCAGCACCTTCTTGGC-3'. GFP tag or 2xHA  
784 tag were inserted into exon 2 of *Elfn2* gene using following target sequence:  
785 5'- AGACCCCCTTCCAGTAATCA-3'. Plasmids pRK5-mGluR2-GFP and pRK5-myc-  
786 mGluR7a (gift from Dr. J. Perroy) were used as PCR template to generate pRK5-SEP-  
787 mGluR2 and pRK5-SEP-mGluR7. pRK5-mOrange-mGluR2 and pRK5-mOrange-mGluR7  
788 were created by exchanging SEP with mOrange in pRK5-SEP-mGluR2 and pRK5-SEP-  
789 mGluR7. pRK5-SEP-mGluR7-N74K was cloned using a site-directed mutagenesis using the  
790 following primers: forward: 5'-GGCGACATCAAGAGGGAGAAAGGGATCCACAGGCTGGA  
791 AGC-3' and reverse: 5'-GCTTCCAGCCTGTGGATCCCTTTCTCCCTCTTGATGTGCGCC-3'. To  
792 create SEP-tagged chimeric variants of mGluR2 and mGluR7, sequences of wild-type  
793 receptors in pRK5-SEP-mGluR2 and pRK5-SEP-mGluR7 were replaced by the sequence of  
794 the chimeric receptor. Chimeric receptors were cloned by fusing sequences encoding different  
795 domains of mGluR2, mGluR7 and mGluR1 as follow:

796 mGluR2-ICD7: 1-819 aa mGluR2 + 849-913 aa mGluR7;  
797 mGluR2-TMD7: 1-556 aa mGluR2 + 578-848 aa mGluR7 + 820-872 mGluR2;  
798 mGluR2-ECD7: 1-583 aa mGluR7 + 562-872 aa mGluR2;  
799 mGluR7-ICD2: 1-848 aa mGluR7 + 820-872 aa mGluR2;  
800 mGluR7-TMD1: 1-588 aa mGluR7 + 591-839 aa mGluR1+ 849-914 aa mGluR7;  
801 mGluR7-TMD2: 1-588 aa mGluR7 + 568-819 aa mGluR2 + 849-914 aa mGluR7;  
802 mGluR7-ECD1: 1-585 aa mGluR1 + 584-913 aa mGluR7;  
803 mGluR7-ECD2: 1-556 aa mGluR2 + 584-913 aa mGluR7.

804 Aminoacid numbering is based on sequences in UniPortKB database (mGluR1 - Q13255-1,  
805 mGluR2 - P31421-1, mGluR7 - P35400-1) and starts with first aminoacid of signal peptide.  
806 pRK5-SEP-mGluR1 (Scheefhals et al., 2019) was used as PCR template for transmembrane  
807 and extracellular domain of mGluR1. All chimeric mGluR variants were cloned using Gibson  
808 assembly (NEBuilder HiFi DNA assembly cloning kit). pRK5-mOrange-mGluR2-ECD7 was  
809 generated by replacing SEP tag in pRK5-SEP-mGluR2-ECD7. Synaptophysin1-mCherry  
810 plasmid was generated by replacing pHluorin-tag in Synaptophysin1-pHluorin (gift from L.  
811 Lagnado, Addgene plasmid # 24478) with mCherry from pmCherry-N1 (Invitrogen). ELFN2-  
812 GFP plasmid was a gift from Dr. E. Sylwestrak (Sylwestrak and Ghosh, 2012). All sequences  
813 were verified by DNA sequencing.

814

#### 815 **Primary rat neuronal culture and transfection**

816 Dissociated hippocampal cultures from embryonic day 18 (E18) Wistar rat (Janvier Labs)  
817 brains of both genders were prepared as described previously (Cunha-Ferreira et al., 2018).  
818 Neurons were plated on 18-mm glass coverslips coated with poly-L-lysine (37.5 mg/ml,  
819 Sigma-Aldrich) and laminin (1.25 mg/ml, Roche Diagnostics) at a density of 100,000 neurons  
820 per well in 12-well plate. Neurons were growing in Neurobasal Medium (NB; Gibco)  
821 supplemented with 2% B27 (Gibco), 0.5 mM L-glutamine (Gibco), 15.6  $\mu$ M L- glutamic acid  
822 (Sigma) and 1% penicillin/streptomycin (Gibco). Once per week, starting from DIV1, half of  
823 the medium was refreshed with BrainPhys neuronal medium (BP, STEMCELL Technologies)  
824 supplemented with 2% NeuroCult SM1 supplement (STEMCELL Technologies) and 1%  
825 penicillin/streptomycin (Gibco). Neurons were transfected at DIV3-4 (knock-in constructs) or  
826 DIV10-11 (overexpression constructs) using Lipofectamine 2000 reagent (Invitrogen).  
827 Shortly before transfection, neurons were transferred to a plate with fresh NB medium with  
828 supplements. Next, a mixture of 2  $\mu$ g of DNA and 3.3  $\mu$ l of Lipofectamine in 200  $\mu$ l of NB

829 medium was incubated for 15 - 30 min and added to each well. After 1 - 2 h, neurons were  
830 briefly washed with NB medium and transferred back to the plate with conditioned medium.  
831 All experiments were performed using neurons at DIV21-24.

832

### 833 **U2OS cells co-culture assays**

834 U2OS cells (ATCC HTB-96) were cultured in DMEM (Lonza) supplemented with 10% fetal  
835 calf serum (Sigma), 2 mM glutamine and 1% penicillin/streptomycin (Gibco). The day before  
836 transfection U2OS cells were seeded in a 6-well plate. Next, cells were transfected using 6 µg  
837 of polyethylenimine (PEI, Polysciences) and 4 µg of DNA per well. Cells were transfected  
838 either with ELFN2-GFP or mOrange-tagged mGluR2/7. 24 h after transfection, cells were  
839 trypsinized, and ELFN2-GFP transfected cells were mixed with mOrange-mGluR2/7  
840 transfected cells in a 1:1 ratio and seeded on 18-mm glass coverslips. 48 h after trypsinization,  
841 U2OS cells were fixed with 4% PFA for 10 min at RT, washed three times with PBS and  
842 mounted in Mowiol mounting medium (Sigma). Imaging of U2OS cells was performed with  
843 Zeiss LSM 700 confocal microscope using 63× NA 1.40 oil objective.

844

### 845 **Immunostaining and gSTED imaging**

846 Neurons at DIV21 were fixed with 4% PFA and 4% sucrose in PBS for 10 min at RT and  
847 washed three times with PBS supplemented with 100 mM glycine. Next, cells were  
848 permeabilized and blocked with 0.1% Triton-X, 10% normal goat serum and 100 mM glycine  
849 in PBS for 1 h at 37°C. Neurons were incubated with primary antibodies diluted in PBS  
850 supplemented with 0.1% Triton-X, 5% normal goat serum and 100 mM glycine for 3 - 4 h at  
851 RT. After three times washing cells with PBS with 100 mM glycine, neurons were incubated  
852 with secondary antibodies diluted in PBS supplements with 0.1% Triton-X, 5% normal goat  
853 serum and 100 mM glycine for 1 h at RT. Cell were washed two times with PBS with 100

854 mM glycine and two times with PBS. Neurons were mounted in Mowiol mounting medium  
855 (Sigma). Dual-color gated STED imaging was performed with a Leica TCS SP8 STED 3  
856 microscope using a HC PL APO 100/1.4 oil-immersion STED WHITE objective. Abberior  
857 STAR 580 and 635P were excited with 561 nm and 633 nm pulsed laser light (white light  
858 laser, 80 MHz) respectively. Both Abberior STAR 580 and 635P were depleted with a 775 nm  
859 pulsed depletion laser. Fluorescence emission was detected using Leica HyD hybrid detector  
860 with gating time from 0.5 ns to 6 ns.

861

### 862 **Live-cell imaging and fluorescence recovery after photobleaching (FRAP) experiments**

863 For all live-cell imaging experiments, cells were kept in a modified Tyrode's solution (pH 7.4)  
864 containing 25 mM HEPES, 119 mM NaCl, 2.4 mM KCl, 2 mM CaCl<sub>2</sub>, 2 mM MgCl<sub>2</sub>, 30 mM  
865 glucose. FRAP experiments were carried out in an environmental chamber at 37°C (TokaHit)  
866 on an inverted Nikon Ti Eclipse microscope equipped with a confocal spinning disk unit  
867 (Yokogawa), an ILas FRAP unit (Roper Scientific France/ PICT-IBiSA, Institut Curie), and  
868 491-nm laser (Cobolt Calypso). Fluorescence emission was detected using a 100x oil-  
869 immersion objective (Nikon Apo, NA 1.4) together with an EM-CCD camera (Photometirc  
870 Evolve 512) controlled by MetaMorph7.7 software (Molecular Divices). Images were  
871 acquired at 1 Hz with an exposure time between 100 and 200 ms. 3 - 5 ROIs covering single  
872 boutons were bleached per field of view.

873

### 874 **Single-molecule tracking with uPAINT**

875 Single molecule tracking was carried out in modified Tyrode's solution supplement with 0.8%  
876 BSA and ATTO647N-conjugated anti-GFP nanobodies (imaging solution) on Nanoimager  
877 microscope (Oxford Nanoimaging; ONI) equipped with a 100x oil-immersion objective  
878 (Olympus Plans Apo, NA 1.4), an XYZ closed-loop piezo stage, 471-nm, 561-nm and 640-

879 nm lasers used for excitation of SEP, mCherry and ATTO647N respectively. Fluorescence  
880 emission was detected using a sCMOS camera (ORCA Flash 4, Hamamatsu). 3,000 images  
881 were acquired in stream mode at 50 Hz in TIRF. Before every tracking acquisition, 30 frames  
882 of SEP and mCherry signal were taken to visualize cell morphology or boutons. To  
883 determine how activity of receptors influences their diffusion, first control acquisitions (2 - 3  
884 fields of view per coverslip) were taken, next chemical reagents or high  $K^+$  solution (2x) were  
885 added to imaging chamber, incubated for 3 - 5 min and final acquisitions of previously  
886 imaged fields of views were performed. High  $K^+$  solution was prepared by replacing 45 mM  
887 NaCl with KCl. Total incubation times with chemical reagents or high  $K^+$  solution did not  
888 exceed 15 min.

889

## 890 **Computational modeling of mGluR activity**

891 **Receptor model:** To study the time-dependent response of mGluRs upon glutamate release, a  
892 G-protein-coupled receptor model was combined with the time-dependent concentration  
893 profile of glutamate released from synaptic vesicles. The cubic ternary complex activation  
894 model (cTCAM) of GPCR signaling describes the interaction of the receptors  $R$ , ligands  $L$   
895 and G-proteins  $G$  (Kinzer-Ursem and Linderman, 2007). The receptors can complex with G-  
896 proteins to form  $RG$  and furthermore, can be in an active state  $R^*$  denoted by the asterisk. G  
897 proteins are produced by a cascade of  $G\alpha_{GTP}$  hydrolysis and  $G_{\beta\gamma}$  binding. The reactions are  
898 described by the following differential equations:

$$\begin{aligned}\frac{dR}{dt} &= -(k_1 + k_3L + \eta k_{11}G)R + \left(\frac{k_1}{K_{act}}\right)R^* + \left(\frac{\eta k_{11}}{K_g}\right)RG + \left(\frac{k_3}{K_a}\right)LR \\ \frac{dLR}{dt} &= -\left(\frac{k_3}{K_a} + \alpha k_a + \eta k_{11}G\right)LR + (k_3L)R + \left(\frac{k_1}{K_{act}}\right)LR^* + \left(\frac{\eta k_{11}}{\gamma K_g}\right)LRG \\ \frac{dRG}{dt} &= (\eta k_{11}G)R - \left(\frac{\eta k_{11}}{K_g} + k_3L + \beta k_1\right)RG + \left(\frac{k_3}{\gamma K_a}\right)LRG + \left(\frac{k_1}{K_{act}}\right)R^*G\end{aligned}$$

$$\begin{aligned} \frac{dLRG}{dt} &= (k_3L)RG - \left( \frac{k_3}{\gamma K_a} + \frac{\eta k_{11}}{\gamma K_g} + \alpha\beta\delta K_1 \right) LRG + (\eta k_{11}G)LR + \left( \frac{k_1}{K_{act}} \right) LR^*G \\ \frac{dR^*}{dt} &= k_1R - \left( \frac{k_1}{K_{act}} + \alpha k_3L + \beta k_{11}G \right) R^* + \left( \frac{k_3}{K_a} \right) LR^* + \left( \frac{k_{11}}{K_g} \right) R^*G + k_{Gact}R^*G \\ \frac{dLR^*}{dt} &= \alpha k_1LR - \left( \frac{k_1}{K_{act}} + \frac{k_3}{K_a} + \beta k_{11}G \right) LR^* + (\alpha k_3L)R^* + \left( \frac{k_{11}}{\delta\gamma K_g} \right) LR^*G + k_{Gact}LR^*G \\ \frac{dR^*G}{dt} &= (\beta k_{11}G)R^* - \left( \frac{k_{11}}{K_g} + \frac{k_1}{K_{act}} + \alpha k_3L + k_{Gact} \right) R^*G + \beta k_1RG + \left( \frac{k_3}{\delta\gamma K_a} \right) LR^*G \\ \frac{dLR^*G}{dt} &= (\alpha k_3L)R^*G - \left( \frac{k_3}{\delta\gamma K_a} + \frac{k_{11}}{\delta\gamma K_g} + \frac{k_1}{K_{act}} + k_{Gact} \right) LR^*G + (\beta k_{11}G)LR^* + \alpha\beta\delta k_1LRG \\ \frac{dG\alpha_{GTP}}{dt} &= k_{Gact}(R^*G + LR^*G) - k_{GTP}G\alpha_{GTP} \\ \frac{dG\alpha_{GDP}}{dt} &= k_{Gact}G\alpha_{GTP} - (k_G G\beta_\gamma)G\alpha_{GDP} \\ \frac{dG\beta_\gamma}{dt} &= k_{Gact}(R^*G + LR^*G) - (k_G G\alpha_{GDP})G\beta_\gamma \\ \frac{dG}{dt} &= -(\eta k_{11}R + \eta k_{11}LR + \beta k_{11}LR^* + \beta k_{11}R^*)G + \left( \frac{\eta k_{11}}{K_g} \right) RG + \left( \frac{\eta k_{11}}{\gamma K_g} \right) LRG \\ &\quad + \left( \frac{k_{11}}{\delta\gamma K_g} \right) LR^*G + \left( \frac{k_{11}}{K_g} \right) R^*G + (k_G G\alpha_{GDP})G\beta_\gamma \end{aligned}$$

899 To find the steady-state solution without ligand ( $L = 0$ ), these equations were solved with  
900 initial conditions  $R = 100$ ,  $G = 1000$  and the remaining variables set to zero using the  
901 NDSolve function of Mathematica (version 12.0, Wolfram Research Inc.). The numerical  
902 values for the used parameters have been described previously (Kinzer-Ursem and  
903 Linderman, 2007) and are summarized in Table S1. The number of receptors and G-proteins  
904 in presynaptic bouton are estimated based on quantitative mass-spectrometry data published  
905 in (Wilhelm et al., 2014). To describe the different behaviors of mGluR2 and mGluR7, only  
906 the association constant  $K_a$  was adjusted to match previously published  $EC_{50}$  values: 10  $\mu$ M  
907 for mGluR2 and 1 mM for mGluR7 (Schoepp et al., 1999). The  $EC_{50}$  value is the  
908 concentration of the ligand that gives the half maximum response. Hence, the response was

909 estimated by the number of  $G\alpha_{GTP}$ . The steady-state solution without ligand was used as the  
 910 initial state of the system and the new steady-state values for different amounts of the ligand  
 911 were numerically determined. The relative normalized change of  $G\alpha_{GTP}$  gives the response:

$$\frac{G\alpha_{GTP}(L) - G\alpha_{GTP}(L = 0)}{G\alpha_{GTP}(L \gg 0) - G\alpha_{GTP}(L = 0)}$$

912 To obtain the  $EC_{50}$  value, the following function was fitted to the data points from the  
 913 numerical solution (Figure 6D):

$$\frac{1}{1 + \left(\frac{EC_{50}}{L}\right)^n}$$

914 In this way, a parameterization of mGluR2 with  $K_a = 0.7 \cdot 10^4 \text{ M}^{-1}$  and respective  $EC_{50} = 10$   
 915  $\mu\text{M}$ , and mGluR7 with  $K_a = 60 \text{ M}^{-1}$  and respective  $EC_{50} = 1.15 \text{ mM}$  was obtained. To  
 916 investigate the ligand receptor affinity, the normalized response of the sum of all formed  
 917 receptor - ligand complexes was determined as (Figure 6C):

$$\frac{LR(L) + LRG(L) + LR^*(L) + LR^*G(L)}{LR(L \gg 1) + LRG(L \gg 1) + LR^*(L \gg 1) + LR^*G(L \gg 1)}$$

918 **Diffusion model:** The time-dependent concentration of glutamate released from a synaptic  
 919 vesicle was described as a point source on an infinite plane. The solution of the diffusion  
 920 equation gives the surface density:

$$c(r, t) = \frac{N}{4\pi Dt} \exp\left(\frac{-r^2}{4Dt}\right)$$

921 in which  $r$ : the distance from the source,

922  $N = 3000$  : the total amount of glutamate released,

923  $D = 4 \cdot 10^{-9} \frac{\text{m}^2}{\text{s}}$ : the diffusion constant of glutamate (Kessler, 2013).

924 To transform the surface density into a concentration the following formula was used:

$$N = \frac{4}{3} \pi r_v^3 C_0$$

925 in which  $r_v = 25 \text{ nm}$ : the radius of a vesicle,



926  $C_0$ : the glutamate concentration inside the vesicle.

927 Next, the surface density was divided by the  $d = 20 \text{ nm}$  width of the synaptic cleft to obtain:

$$C(r, t) = \frac{r_v^3 C_0}{3dDt} \exp\left(\frac{-r^2}{4Dt}\right)$$

928 Hence, the initial concentration is given by:

$$C_0 = \frac{N}{N_A \frac{4}{3} \pi r_v^3 10^3} = 75 \text{ mM}$$

929 in which  $N_A$ : Avogadro's constant.

930 To describe the glutamate concentration from a sequence of vesicles release events,

931 superposition was used as follows:

$$L(t) = \sum_{i=0}^{n-1} H\left(t - \frac{i}{f}\right) C\left(r, t - \frac{i}{f}\right)$$

932 in which  $n$ : the number of vesicles released,

933  $f$ : the release frequency,

934  $H(x) = \begin{cases} 1 & x > 0 \\ 0 & \text{otherwise} \end{cases}$  : a step function.

935 The diffusion profile was combined with the receptor model and the differential equations

936 were solved numerically for a given distance  $r$  from the release site. For the initial conditions,

937 the steady-state solution without ligand was used. Because of the non-linearities in the

938 equations and the possible large values of the concentration profile for small times, to solve

939 the equations numerically, we reduced the accuracy and precision of the numerical integration

940 method in Mathematica's NDSolve function. This adjustment potentially introduced an error

941 of less than 5 percent, which is small enough to be neglected in our analysis and conclusions.

942

943

944

945

946

947 **Table supplement 1.** Parameters used in cTCAM model of presynaptic mGluRs activity  
 948

| Parameter <sup>1</sup>                                                     | Symbol     | Value (unit)                                 |
|----------------------------------------------------------------------------|------------|----------------------------------------------|
| Receptor activation rate                                                   | $k_I$      | $0.1 \text{ s}^{-1}$                         |
| #active/#inactive receptors                                                | $K_{act}$  | 0.01                                         |
| Receptors - G protein collision efficiency                                 | $\eta$     | 0.5                                          |
| Receptor - G protein association rate                                      | $k_{II}$   | $1 \cdot 10^{-4} \text{ \#/cell s}^{-1}$     |
| Receptor - G protein binding affinity                                      | $K_g$      | $1 \cdot 10^{-4} \text{ \#/cell}$            |
| Ligand - Receptor association constant                                     | $k_3$      | $1 \cdot 10^7 \text{ M}^{-1} \text{ s}^{-1}$ |
| Ligand - Receptor equilibrium association constant for mGluR2 <sup>2</sup> | $K_a$      | $0.7 \cdot 10^4 \text{ M}^{-1}$              |
| Ligand - Receptor equilibrium association constant for mGluR7 <sup>2</sup> | $K_a$      | $60 \text{ M}^{-1}$                          |
| Parameter for receptor activation via ligand binding                       | $\alpha$   | 5                                            |
| Parameter for G protein coupling via receptor activation                   | $\beta$    | 5                                            |
| Joint coupling parameter (activation, ligand binding, G protein coupling)  | $\delta$   | 5                                            |
| Parameter for G protein coupling via ligand binding                        | $\gamma$   | 5                                            |
| G protein activation rate                                                  | $k_{Gact}$ | $5 \text{ s}^{-1}$                           |
| GTP hydrolysis rate                                                        | $k_{GTP}$  | $1 \text{ s}^{-1}$                           |
| $G_{\alpha\beta\gamma}$ association constant                               | $k_G$      | $1 \cdot 10^{-4} \text{ \#/cell s}^{-1}$     |
| Total numbers of receptors <sup>3</sup>                                    | $R_{tot}$  | 100                                          |
| Total numbers of G proteins <sup>3</sup>                                   | $G_{tot}$  | 1000                                         |

949 <sup>1</sup> values used in simulation are taken from (Kinzer-Ursem and Linderman, 2007) unless  
 950 indicated otherwise

951 <sup>2</sup>  $K_a$  for mGluR2 and mGluR7 was estimated by calibration cTCAM model to match output  
 952  $G_{\alpha GTP}$  concentration with published  $EC_{50}$  values (Schoepp et al., 1999).

953 <sup>3</sup> total numbers of presynaptic mGluRs and G-proteins inside presynaptic boutons were  
 954 estimated based on quantitative mass-spectrometry data published in (Wilhelm et al., 2014).  
 955

956

957 **Data analysis**

958 ***Quantification of co-localization:*** Analysis of co-localization between Bsn and mGluRs was  
959 done using Spot Detector and Colocalization Studio plug-ins built-in in Icy software (De  
960 Chaumont et al., 2012). Objects detected with Spot Detector (size of detected spots: ~7 pixel  
961 with sensitivity 100 and ~13 pixels with sensitivity 80) were loaded into Colocalization  
962 Studio and statistical object distance analysis (SODA) (Lagache et al., 2018) was performed  
963 to obtain the fraction of mGluR spots co-localized with Bsn spots.

964 ***Quantification of bouton enrichment of overexpressed SEP-mGluRs:*** Neuron co-expressing  
965 cytosolic mCherry and SEP-mGluR2 or SEP-mGluR7 were fixed at DIV21 with 4% PFA and  
966 4% sucrose from 10 min in RT. Next, cells were washed three times with PBS and mounted in  
967 Mowiol mounting medium (Sigma). Imaging was performed on with Zeiss LSM 700 confocal  
968 microscope using 63× NA 1.40 oil objective. To analyze enrichment of mGluRs in  
969 presynaptic boutons, line profiles along boutons and neighboring axonal region were drawn in  
970 ImageJ (line width 3 pixels). Next, intensity profiles were fitted with a Gaussian function in  
971 GraphPad Prism. To calculate the ratio of intensity in bouton over axon, the amplitude of the  
972 Gaussian fit was divided by the minimum value of the fit.

973 ***Quantification of FRAP experiments:*** Time series obtained during FRAP experiments were  
974 corrected for drift when needed using Template Matching plug-in in ImageJ. Circular ROIs  
975 with the size of the bleached area were drawn in ImageJ. Fluorescent intensity transients were  
976 normalized by subtracting the intensity values of the 1<sup>st</sup> frame after bleaching and dividing by  
977 the average intensity value of the baseline (5 frames before bleaching). Mobile fraction was  
978 calculated by averaging the values of the last 5 points of fluorescent transients. Half-time of  
979 recovery was determined by fitting a single exponential function to the recovery traces.

980 ***Single-molecule tracking analysis:*** NimOS software (Oxford Nanoimager; ONI) was used to  
981 detect localization of single molecules in uPAINT experiments. Molecules with a localization

982 precision < 50 nm and photon count > 200 photons were used for analysis. To filter out  
983 unspecific background localizations from outside neurons, a cell mask based on the SEP  
984 image was created using an adaptive image threshold in Matlab (sensitivity 40-55). Only  
985 localizations inside the mask were included in further analysis. Tracking and calculation of  
986 the diffusion coefficient were performed in custom-written Matlab (MathWorks) scripts  
987 described previously (Willems et al., 2020). Only trajectories longer than 30 frames were used  
988 to estimate the instantaneous diffusion coefficient. Classification of molecule state as mobile  
989 or immobile was based on ratio between the radius of gyration and mean step size of  
990 individual trajectories using formula  $\frac{\sqrt{\pi/2} \times \text{radius of gyration}}{\text{mean step size}}$  (Golan and Sherman, 2017).  
991 Molecules with a ratio < 2.11 were considered immobile. Mask of presynaptic boutons was  
992 created based on the TIRF image of Synaptophysin1-mCherry as previously described(Li and  
993 Blanpied, 2016). Synaptic trajectories were defined as trajectories which had at least one  
994 localization inside bouton mask.

995 ***Statistical analysis:*** All used in this study statistical tests are described in figure legends and  
996 the main text. All statistical analysis and graphs were prepared in GraphPad Prism.

997

998 **AUTHOR CONTRIBUTIONS**

999 Conceptualization, Methodology, Validation, & Formal Analysis, A.B., F.B. and  
1000 H.D.M.; Investigation, A.B. and F.B.; Resources,  
1001 H.D.M.; Writing – Original Draft & Editing, A.B. and  
1002 H.D.M.; Writing – Review, F.B.; Visualization, A.B.;  
1003 Supervision, H.D.M.; Funding Acquisition, H.D.M.

1004

1005 **ACKNOWLEDGEMENTS**

1006 We would like to thank dr. Arthur de Jong for critical reading of the manuscript, Manon  
1007 Westra for help with Matlab scripts and all members of the MacGillavry lab for helpful  
1008 discussions. This work was supported by the European Research Council (ERC-StG 716011)  
1009 to H.D.M.

1010

1011 **DECLARATION OF INTERESTS**

1012 The authors declare no competing interests.

1013

1014 **REFERENCES**

- 1015 Billups B, Graham BP, Wong AYC, Forsythe ID. 2005. Unmasking group III metabotropic glutamate  
1016 autoreceptor function at excitatory synapses in the rat CNS. *J Physiol* **565**:885–896.  
1017 doi:10.1113/jphysiol.2005.086736
- 1018 Boudin H, Doan A, Xia J, Shigemoto R, Haganir RL, Worley P, Craig AM. 2000. Presynaptic clustering of  
1019 mGluR7a requires the PICK1PDZ domain binding site. *Neuron* **28**:485–497.
- 1020 Bushell TJ, Sansig G, Collett VJ, van der Putten H, Collingridge GL. 2002. Altered short-term synaptic plasticity  
1021 in mice lacking the metabotropic glutamate receptor mGlu7. *ScientificWorldJournal* **2**:730–7.  
1022 doi:10.1100/tsw.2002.146
- 1023 Calebiro D, Rieken F, Wagner J, Sungkaworn T, Zabel U, Borzi A, Cocucci E, Zürn A, Lohse MJ. 2013. Single-  
1024 molecule analysis of fluorescently labeled G-protein-coupled receptors reveals complexes with distinct  
1025 dynamics and organization. *Proc Natl Acad Sci U S A* **110**:743–748. doi:10.1073/pnas.1205798110
- 1026 Cunha-Ferreira I, Chazeau A, Buijs RR, Stucchi R, Will L, Pan X, Adolfs Y, van der Meer C, Wolthuis JC,  
1027 Kahn OI, Schätzle P, Altelaar M, Pasterkamp RJ, Kapitein LC, Hoogenraad CC. 2018. The HAUS  
1028 Complex Is a Key Regulator of Non-centrosomal Microtubule Organization during Neuronal  
1029 Development. *Cell Rep* **24**:791–800. doi:10.1016/j.celrep.2018.06.093
- 1030 Dasgupta A, Lim YJ, Kumar K, Baby N, Pang KKL, Benoy A, Behnisch T, Sajikumar S. 2020. Group III  
1031 metabotropic glutamate receptors gate long-term potentiation and synaptic tagging/capture in rat  
1032 hippocampal area CA2. *Elife* **9**:1–20. doi:10.7554/elife.55344
- 1033 De Chaumont F, Dallongeville S, Chenouard N, Hervé N, Pop S, Provoost T, Meas-Yedid V, Pankajakshan P,  
1034 Lecomte T, Le Montagner Y, Lagache T, Dufour A, Olivo-Marin JC. 2012. Icy: An open bioimage  
1035 informatics platform for extended reproducible research. *Nat Methods* **9**:690–696. doi:10.1038/nmeth.2075
- 1036 de Jong AP, Verhage M. 2009. Presynaptic signal transduction pathways that modulate synaptic transmission.  
1037 *Curr Opin Neurobiol* **19**:245–253. doi:10.1016/j.conb.2009.06.005
- 1038 Diamond JS, Jahr CE. 1997. Transporters buffer synaptically released glutamate on a submillisecond time scale.  
1039 *J Neurosci* **17**:4672–4687. doi:10.1523/jneurosci.17-12-04672.1997
- 1040 Dunn HA, Orlandi C, Martemyanov KA. 2019a. Beyond the ligand: Extracellular and transcellular G protein-  
1041 coupled receptor complexes in physiology and pharmacology. *Pharmacol Rev* **71**:503–519.  
1042 doi:10.1124/pr.119.018044
- 1043 Dunn HA, Patil DN, Cao Y, Orlandi C, Martemyanov KA. 2018. Synaptic adhesion protein ELFN1 is a selective

- 1044           allosteric modulator of group III metabotropic glutamate receptors in trans. *Proc Natl Acad Sci* **115**:5022–  
1045           5027. doi:10.1073/pnas.1722498115
- 1046   Dunn HA, Zucca S, Dao M, Orlandi C, Martemyanov KA. 2019b. ELFN2 is a postsynaptic cell adhesion  
1047           molecule with essential roles in controlling group III mGluRs in the brain and neuropsychiatric behavior.  
1048           *Mol Psychiatry* **24**:1902–1919. doi:10.1038/s41380-019-0512-3
- 1049   Ferrero JJ, Bartolomé-Martín D, Torres M, Sánchez-Prieto J. 2013. Potentiation of mGlu7 receptor-mediated  
1050           glutamate release at nerve terminals containing N and P/Q type Ca<sup>2+</sup> channels. *Neuropharmacology*  
1051           **67**:213–222. doi:10.1016/j.neuropharm.2012.10.032
- 1052   Francesconi A, Duvoisin RM. 2002. Alternative splicing unmasks dendritic and axonal targeting signals in  
1053           metabotropic glutamate receptor 1. *J Neurosci* **22**:2196–205. doi:10.1523/jneurosci.22-06-02196.2002
- 1054   Giannone G, Hosy E, Levet F, Constals A, Schulze K, Sobolevsky AI, Rosconi MP, Gouaux E, Tampe R,  
1055           Choquet D, Cognet L. 2010. Dynamic superresolution imaging of endogenous proteins on living cells at  
1056           ultra-high density. *Biophys J* **99**:1303–1310. doi:10.1016/j.bpj.2010.06.005
- 1057   Golan Y, Sherman E. 2017. Resolving mixed mechanisms of protein subdiffusion at the T cell plasma  
1058           membrane. *Nat Commun* **8**:1–15. doi:10.1038/ncomms15851
- 1059   Gutzeit VA, Thibado J, Stor DS, Zhou Z, Blanchard SC, Andersen OS, Levitz J. 2019. Conformational dynamics  
1060           between transmembrane domains and allosteric modulation of a metabotropic glutamate receptor. *Elife*  
1061           **8**:1–29. doi:10.7554/elife.45116
- 1062   Hirbec H, Perestenko O, Nishimune A, Meyer G, Nakanishi S, Henley JM, Dev KK. 2002. The PDZ proteins  
1063           PICK1, GRIP, and syntenin bind multiple glutamate receptor subtypes. Analysis of PDZ binding motifs. *J*  
1064           *Biol Chem* **277**:15221–15224. doi:10.1074/jbc.C200112200
- 1065   Jullié D, Stoeber M, Sibarita JB, Zieger HL, Bartol TM, Arttamangkul S, Sejnowski TJ, Hosy E, von Zastrow M.  
1066           2020. A Discrete Presynaptic Vesicle Cycle for Neuromodulator Receptors. *Neuron* **105**:663-677.e8.  
1067           doi:10.1016/j.neuron.2019.11.016
- 1068   Kamiya H, Ozawa S. 1999. Dual mechanism for presynaptic modulation by axonal metabotropic glutamate  
1069           receptor at the mouse mossy fibre-CAS synapse. *J Physiol* **518**:497–506. doi:10.1111/j.1469-  
1070           7793.1999.0497p.x
- 1071   Kammermeier PJ. 2015. Constitutive activity of metabotropic glutamate receptor 7. *BMC Neurosci* **16**:17.  
1072           doi:10.1186/s12868-015-0154-6
- 1073   Kang HJ, Wilkins AD, Lichtarge O, Wensel TG. 2015. Determinants of endogenous ligand specificity

- 1074 divergence among metabotropic glutamate receptors. *J Biol Chem* **290**:2870–2878.
- 1075 doi:10.1074/jbc.M114.622233
- 1076 Kasai RS, Kusumi A. 2014. Single-molecule imaging revealed dynamic GPCR dimerization. *Curr Opin Cell*
- 1077 *Biol* **27**:78–86. doi:10.1016/j.ceb.2013.11.008
- 1078 Kessler JP. 2013. Control of Cleft Glutamate Concentration and Glutamate Spill-Out by Perisynaptic Glia:
- 1079 Uptake and Diffusion Barriers. *PLoS One* **8**. doi:10.1371/journal.pone.0070791
- 1080 Kinoshita A, Shigemoto R, Ohishi H, Van Der Putten H, Mizuno N. 1998. Immunohistochemical localization of
- 1081 metabotropic glutamate receptors, mGluR7a and mGluR7b, in the central nervous system of the adult rat
- 1082 and mouse: A light and electron microscopic study. *J Comp Neurol* **393**:332–352.
- 1083 doi:10.1002/(SICI)1096-9861(19980413)393:3<332::AID-CNE6>3.0.CO;2-2
- 1084 Kinzer-Ursem TL, Linderman JJ. 2007. Both ligand- and cell-specific parameters control ligand agonism in a
- 1085 kinetic model of G protein-coupled receptor signaling. *PLoS Comput Biol* **3**:0084–0094.
- 1086 doi:10.1371/journal.pcbi.0030006
- 1087 Klar R, Walker AG, Ghose D, Grueter B a, Engers DW, Hopkins CR, Lindsley CW, Xiang Z, Conn PJ,
- 1088 Niswender CM. 2015. Activation of Metabotropic Glutamate Receptor 7 Is Required for Induction of
- 1089 Long-Term Potentiation at SC-CA1 Synapses in the Hippocampus. *J Neurosci* **35**:7600–15.
- 1090 doi:10.1523/JNEUROSCI.4543-14.2015
- 1091 Lagache T, Grassart A, Dallongeville S, Faklaris O, Sauvonnet N, Dufour A, Danglot L, Olivo-Marin JC. 2018.
- 1092 Mapping molecular assemblies with fluorescence microscopy and object-based spatial statistics. *Nat*
- 1093 *Commun* **9**:102–108. doi:10.1016/j.ncom.2018.11.033
- 1094 Li TP, Blanpied TA. 2016. Control of transmembrane protein diffusion within the postsynaptic density assessed
- 1095 by simultaneous single-molecule tracking and localization microscopy. *Front Synaptic Neurosci* **8**:1–14.
- 1096 doi:10.3389/fnsyn.2016.00019
- 1097 Lisman JE, Raghavachari S, Tsien RW. 2007. The sequence of events that underlie quantal transmission at
- 1098 central glutamatergic synapses. *Nat Rev Neurosci* **8**:597–609. doi:10.1038/nrn2191
- 1099 Martín R, Durroux T, Ciruela F, Torres M, Pin JP, Sánchez-Prieto J. 2010. The metabotropic glutamate receptor
- 1100 mGlu7 activates phospholipase C, translocates munc-13-1 protein, and potentiates glutamate release at
- 1101 cerebrocortical nerve terminals. *J Biol Chem* **285**:17907–17917. doi:10.1074/jbc.M109.080838
- 1102 Martín R, Ferrero JJ, Collado-Alsina A, Aguado C, Luján R, Torres M, Sánchez-Prieto J. 2018. Bidirectional
- 1103 modulation of glutamatergic synaptic transmission by metabotropic glutamate type 7 receptors at Schaffer



- 1104 collateral–CA1 hippocampal synapses. *J Physiol* **596**:921–940. doi:10.1113/JP275371
- 1105 Martín R, Torres M, Sánchez-Prieto J. 2007. mGluR7 inhibits glutamate release through a PKC-independent  
1106 decrease in the activity of P/Q-type Ca<sup>2+</sup> channels and by diminishing cAMP in hippocampal nerve  
1107 terminals. *Eur J Neurosci* **26**:312–22. doi:10.1111/j.1460-9568.2007.05660.x
- 1108 Mikasova L, Groc L, Choquet D, Manzoni OJ. 2008. Altered surface trafficking of presynaptic cannabinoid type  
1109 1 receptor in and out synaptic terminals parallels receptor desensitization. *Proc Natl Acad Sci U S A*  
1110 **105**:18596–18601. doi:10.1073/pnas.0805959105
- 1111 Millán C, Luján R, Shigemoto R, Sánchez-Prieto J. 2002. The inhibition of glutamate release by metabotropic  
1112 glutamate receptor 7 affects both [Ca<sup>2+</sup>]<sub>i</sub> and cAMP: evidence for a strong reduction of Ca<sup>2+</sup> entry in  
1113 single nerve terminals. *J Biol Chem* **277**:14092–101. doi:10.1074/jbc.M109044200
- 1114 Muly EC, Mania I, Guo J-D, Rainnie DG. 2007. Group II metabotropic glutamate receptors in anxiety circuitry:  
1115 Correspondence of physiological response and subcellular distribution. *J Comp Neurol* **505**:682–700.  
1116 doi:10.1002/cne.21525
- 1117 Niswender CM, Conn PJ. 2010. Metabotropic glutamate receptors: physiology, pharmacology, and disease.  
1118 *Annu Rev Pharmacol Toxicol* **50**:295–322. doi:10.1146/annurev.pharmtox.011008.145533
- 1119 Ohishi H, Ogawa-Meguro R, Shigemoto R, Kaneko T, Nakanishi S, Mizuno N. 1994. Immunohistochemical  
1120 localization of metabotropic glutamate receptors, mGluR2 and mGluR3, in rat cerebellar cortex. *Neuron*  
1121 **13**:55–66. doi:10.1016/0896-6273(94)90459-6
- 1122 Okamoto N, Hori S, Akazawa C, Hayashi Y, Shigemoto R, Mizuno N, Nakanishi S. 1994. Molecular  
1123 characterization of a new metabotropic glutamate receptor mGluR7 coupled to inhibitory cyclic AMP  
1124 signal transduction. *J Biol Chem* **269**:1231–1236.
- 1125 Pelkey KA, Lavezzari G, Racca C, Roche KW, McBain CJ. 2005. mGluR7 is a metaplastic switch controlling  
1126 bidirectional plasticity of feedforward inhibition. *Neuron* **46**:89–102. doi:10.1016/j.neuron.2005.02.011
- 1127 Pelkey KA, Topolnik L, Yuan XQ, Lacaille JC, McBain CJ. 2008. State-Dependent cAMP Sensitivity of  
1128 Presynaptic Function Underlies Metaplasticity in a Hippocampal Feedforward Inhibitory Circuit. *Neuron*  
1129 **60**:980–987. doi:10.1016/j.neuron.2008.11.018
- 1130 Petralia RS, Wang Y-X, Niedzielski AS, Wenthold RJ. 1996. The metabotropic glutamate receptors, MGLUR2  
1131 and MGLUR3, show unique postsynaptic, presynaptic and glial localizations. *Neuroscience* **71**:949–976.  
1132 doi:10.1016/0306-4522(95)00533-1
- 1133 Pinheiro PS, Mulle C. 2008. Presynaptic glutamate receptors: physiological functions and mechanisms of action.

- 1134 *Nat Rev Neurosci* **9**:423–436. doi:10.1038/nrn2379
- 1135 Reiner A, Levitz J. 2018. Glutamatergic Signaling in the Central Nervous System: Ionotropic and Metabotropic  
1136 Receptors in Concert. *Neuron* **98**:1080–1098. doi:10.1016/j.neuron.2018.05.018
- 1137 Robbe D, Alonso G, Chaumont S, Bockaert J, Manzoni OJ. 2002. Role of p/q-Ca<sup>2+</sup> channels in metabotropic  
1138 glutamate receptor 2/3-dependent presynaptic long-term depression at nucleus accumbens synapses. *J*  
1139 *Neurosci* **22**:4346–4356. doi:20026420\|r22/11/4346 [pii]
- 1140 Sansig G, Bushell TJ, Clarke VR, Rozov A, Burnashev N, Portet C, Gasparini F, Schmutz M, Klebs K,  
1141 Shigemoto R, Flor PJ, Kuhn R, Knoepfel T, Schroeder M, Hampson DR, Collett VJ, Zhang C, Duvoisin  
1142 RM, Collingridge GL, van Der Putten H. 2001. Increased seizure susceptibility in mice lacking  
1143 metabotropic glutamate receptor 7. *J Neurosci* **21**:8734–45.
- 1144 Scanziani M, Salin PA, Vogt KE, Malenka RC, Nicoll RA. 1997. Use-dependent increases in glutamate  
1145 concentration activate presynaptic metabotropic glutamate receptors. *Nature* **385**:630–4.  
1146 doi:10.1038/385630a0
- 1147 Scheefhals N, Catsburg LAE, Westerveld ML, Blanpied TA, Hoogenraad CC, MacGillavry HD. 2019. Shank  
1148 Proteins Couple the Endocytic Zone to the Postsynaptic Density to Control Trafficking and Signaling of  
1149 Metabotropic Glutamate Receptor 5. *Cell Rep* **29**:258-269.e8. doi:10.1016/j.celrep.2019.08.102
- 1150 Schoepp DD, Jane DE, Monn JA. 1999. Pharmacological agents acting at subtypes of metabotropic glutamate  
1151 receptors. *Neuropharmacology* **38**:1431–1476. doi:10.1016/S0028-3908(99)00092-1
- 1152 Shigemoto R, Kinoshita A, Wada E, Nomura S, Ohishi H, Takada M, Flor PJ, Neki A, Abe T, Nakanishi S,  
1153 Mizuno N. 1997. Differential presynaptic localization of metabotropic glutamate receptor subtypes in the  
1154 rat hippocampus. *J Neurosci* **17**:7503–22. doi:9295396
- 1155 Shigemoto R, Kulik A, Roberts JDB, Ohishi H, Nusser Z, Kaneko T, Somogyi P. 1996. Target-cell-specific  
1156 concentration of a metabotropic glutamate receptor in the presynaptic active zone. *Nature* **381**:523–5.  
1157 doi:10.1038/381523a0
- 1158 Siddig S, Aufmkolk S, Doose S, Jobin M-L, Werner C, Sauer M, Calebiro D. 2020. Super-resolution imaging  
1159 reveals the nanoscale organization of metabotropic glutamate receptors at presynaptic active zones. *Sci*  
1160 *Adv* **6**:eaay7193. doi:10.1126/sciadv.aay7193
- 1161 Stachniak XTJ, Sylwestrak XEL, Scheiffele XP, Hall BJ, Ghosh A, Stachniak TJ, Sylwestrak EL, Scheiffele P,  
1162 Hall BJ, Ghosh A. 2019. Elnf1-Induced Constitutive Activation of mGluR7 Determines Frequency-  
1163 Dependent Recruitment of Somatostatin Interneurons. *J Neurosci* **39**:4461–4474.

- 1164 doi:10.1523/jneurosci.2276-18.2019
- 1165 Suh YH, Pelkey KA, Lavezzari G, Roche PA, Huganir RL, McBain CJ, Roche KW. 2008. Corequirement of  
1166 PICK1 Binding and PKC Phosphorylation for Stable Surface Expression of the Metabotropic Glutamate  
1167 Receptor mGluR7. *Neuron* **58**:736–48. doi:10.1016/j.neuron.2008.03.028
- 1168 Sungkaworn T, Jobin ML, Burnecki K, Weron A, Lohse MJ, Calebiro D. 2017. Single-molecule imaging reveals  
1169 receptor-G protein interactions at cell surface hot spots. *Nature* **550**:543–547. doi:10.1038/nature24264
- 1170 Sylwestrak EL, Ghosh A. 2012. Elnf1 regulates target-specific release probability at CA1-interneuron synapses.  
1171 *Science (80- )* **338**:536–540. doi:10.1126/science.1222482
- 1172 Tomioka NH, Yasuda H, Miyamoto H, Hatayama M, Morimura N, Matsumoto Y, Suzuki T, Odagawa M, Odaka  
1173 YS, Iwayama Y, Won Um J, Ko J, Inoue Y, Kaneko S, Hirose S, Yamada K, Yoshikawa T, Yamakawa K,  
1174 Aruga J. 2014. Elnf1 recruits presynaptic mGluR7 in trans and its loss results in seizures. *Nat Commun*  
1175 **5**:1–16. doi:10.1038/ncomms5501
- 1176 Wilhelm BG, Mandad S, Truckenbrodt S, Kröhnert K, Schäfer C, Rammner B, Koo SJ, Claßen G a, Krauss M,  
1177 Haucke V, Urlaub H, Rizzoli SO. 2014. Composition of isolated synaptic boutons reveals the amounts of  
1178 vesicle trafficking proteins. *Science (80- )* **344**:1023–8. doi:10.1126/science.1252884
- 1179 Willems J, de Jong APH, Scheefhals N, Mertens E, Catsburg LAE, Poorthuis RB, de Winter F, Verhaagen J,  
1180 Meye FJ, MacGillavry HD. 2020. ORANGE: A CRISPR/Cas9-based genome editing toolbox for epitope  
1181 tagging of endogenous proteins in neurons. *PLoS Biol* **18**:e3000665. doi:10.1371/journal.pbio.3000665
- 1182 Woolley ML, Pemberton DJ, Bate S, Corti C, Jones DNC. 2008. The mGlu2 but not the mGlu3 receptor  
1183 mediates the actions of the mGluR2/3 agonist, LY379268, in mouse models predictive of antipsychotic  
1184 activity. *Psychopharmacology (Berl)* **196**:431–440. doi:10.1007/s00213-007-0974-x
- 1185 Yanagawa M, Hiroshima M, Togashi Y, Abe M, Yamashita T, Shichida Y, Murata M, Ueda M, Sako Y. 2018.  
1186 Single-molecule diffusion-based estimation of ligand effects on G protein-coupled receptors. *Sci Signal* **11**.  
1187 doi:10.1126/scisignal.aao1917
- 1188 Zhang C-S, Bertaso F, Eulenburg V, Lerner-Natoli M, Herin GA, Bauer L, Bockaert J, Fagni L, Betz H,  
1189 Scheschonka A. 2008. Knock-In Mice Lacking the PDZ-Ligand Motif of mGluR7a Show Impaired PKC-  
1190 Dependent Autoinhibition of Glutamate Release, Spatial Working Memory Deficits, and Increased  
1191 Susceptibility to Pentylentetrazol. *J Neurosci* **28**:8604–8614. doi:10.1523/JNEUROSCI.0628-08.2008
- 1192
